# Supplementary material
Source: PubMed Central journal article supplement (PMC3719478)

# Supporting Information:

## CH-01 is a hypoxia-activated prodrug that sensitizes cells to hypoxia/reoxygenation through inhibition of Chk1 and Aurora A

*Cindy Cazares-Körner<sup>1,2\*</sup>, Isabel M. Pires<sup>1\*</sup>, I. Diane Swallow<sup>2\*</sup>, Samuel C. Grayer<sup>2</sup>, Liam O'Connor<sup>1,2</sup>, Monica M. Olcina<sup>1</sup>, Martin Christlieb<sup>1</sup>, Stuart J. Conway<sup>2§</sup> and Ester M. Hammond<sup>1§</sup>*

<sup>1</sup>Cancer Research UK/MRC Gray Institute for Radiation Oncology and Biology, Department of Oncology, University of Oxford, Old Road Campus Research Building, Oxford, OX3 7DQ, UK. <sup>2</sup>Department of Chemistry, Chemistry Research Laboratory, University of Oxford, Mansfield Road, Oxford, OX1 3TA, UK.

\*These authors contributed equally to the work.

§To whom correspondence should be addressed:

ester.hammond@oncology.ox.ac.uk, telephone: +44 (0) 1865 617320, fax +44 (0)1865 617394; stuart.conway@chem.ox.ac.uk, telephone: +44 (0)1865 285 109, fax: +44 (0)1865 285 002.

### Table of Contents

|                                                     |     |
|-----------------------------------------------------|-----|
| <b>Supplementary Figures S1 and S2</b>              | S2  |
| <b>Supplementary Figure S3</b>                      | S3  |
| <b>Supplementary Figure S4</b>                      | S4  |
| <b>Docking with AutoDock Vina</b>                   | S5  |
| <b>General Experimental</b>                         | S6  |
| <b>Experimental Procedures</b>                      | S8  |
| <b>References</b>                                   | S16 |
| <b><sup>1</sup>H and <sup>13</sup>C NMR Spectra</b> | S17 |

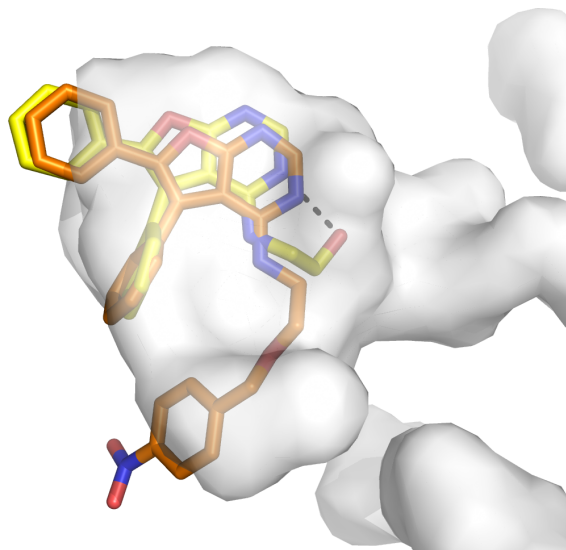

**Figure S1.** A representative image of compound **1** (carbon = orange) docked to the X-ray crystal structure of compound **6** (carbon = yellow) bound to Chk1 (PDB ID, 2BRB). The surface of the binding site is shown. Docking indicated that the binding of the 4-nitrobenzyl derivative **1** to Chk1 was less favorable than binding of **6**.

**A**

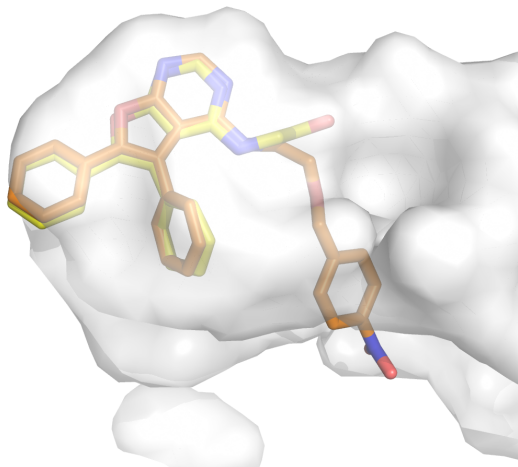

**B**

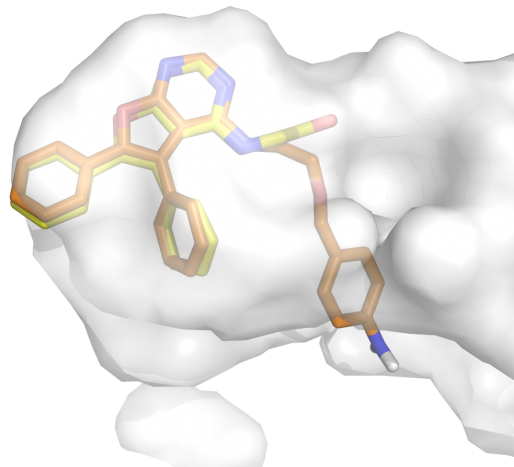

**Figure S2.** (A). A representative image of compound **1** (carbon = orange) docked to the X-ray crystal structure of compound **6** (carbon = yellow) bound to Aurora A (PDB ID, 3K5U). Docking indicated that the 4-nitrobenzyl group of **1** can potentially be accommodated in the ATP-binding site. (B). A representative image of amine **5** (carbon = orange) docked to the X-ray crystal structure of compound **6** (carbon = yellow) bound to Aurora A (PDB ID, 3K5U). Docking indicated that the 4-aminobenzyl group of **5** can potentially be accommodated in the ATP-binding site. The surface of the binding site is shown.

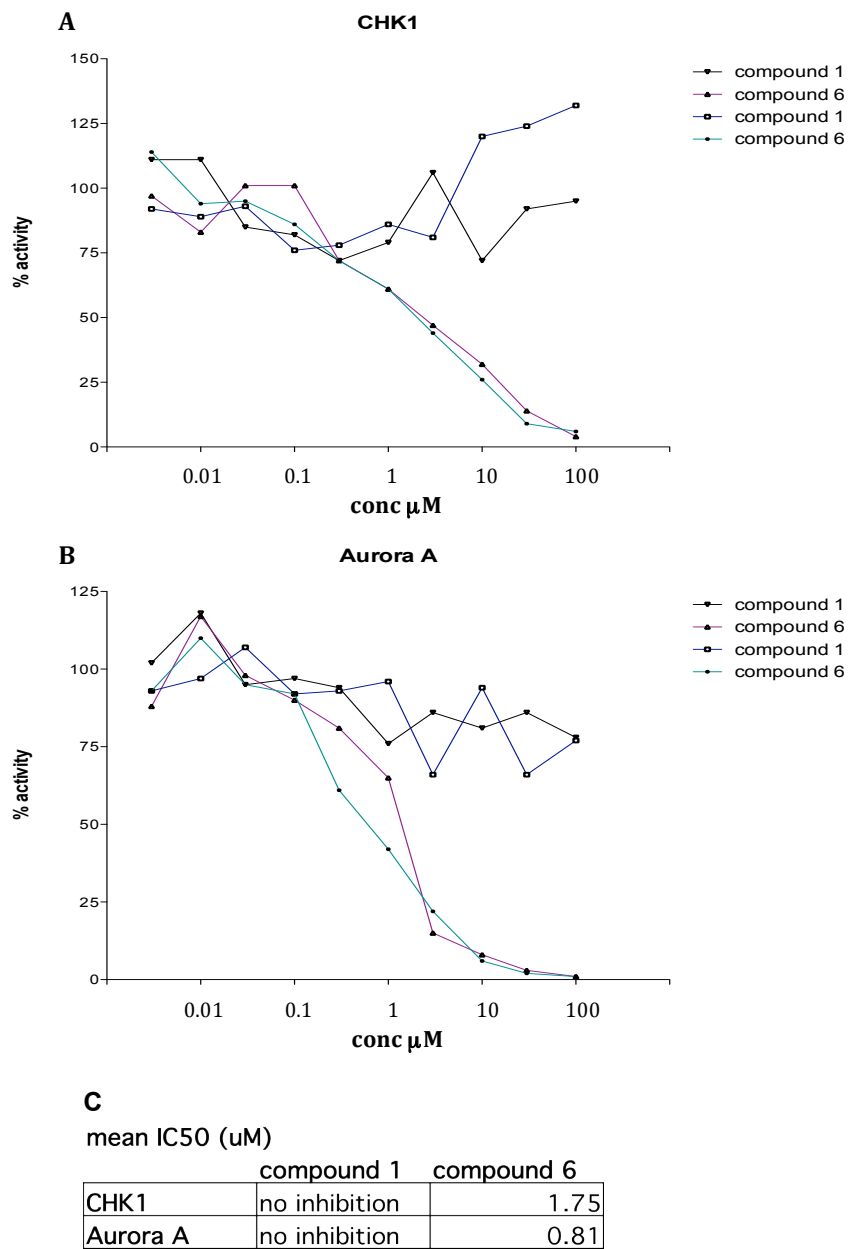

**Figure S3.** The IC<sub>50</sub> values of compounds **1** and **6** were obtained for Chk1 and Aurora kinase A using a radioactive (<sup>33</sup>P-ATP) filter-binding assay. (A) Compound **1** shows no inhibition of Chk1 whereas compound **6** has an IC<sub>50</sub> value of 1.75 μM. (B) Compound **1** shows no inhibition of Aurora kinase A whereas compound **6** has an IC<sub>50</sub> value of 0.81 μM. This analysis was carried out by The International Centre for Kinase profiling, University of Dundee (<http://www.kinase-screen.mrc.ac.uk/>). (C) Mean IC<sub>50</sub> values.

**A**

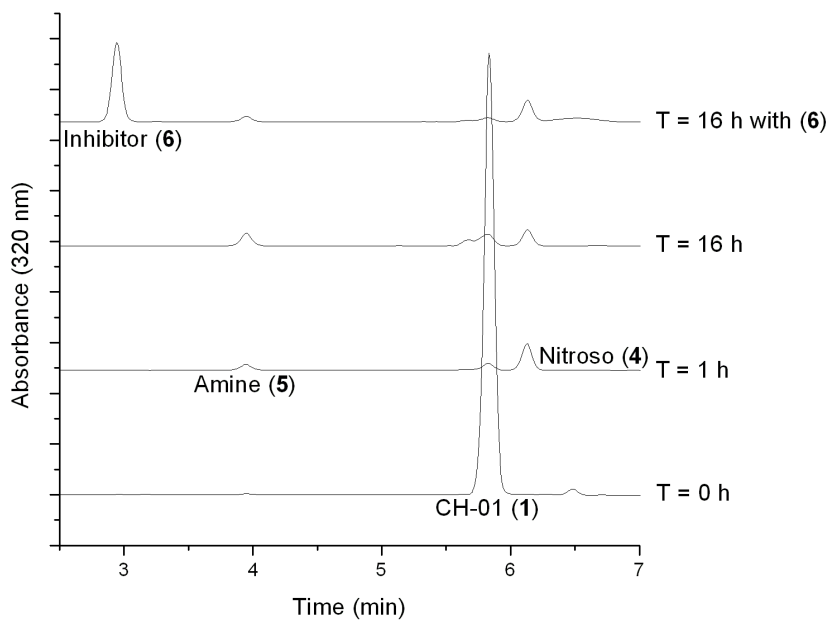

**B**

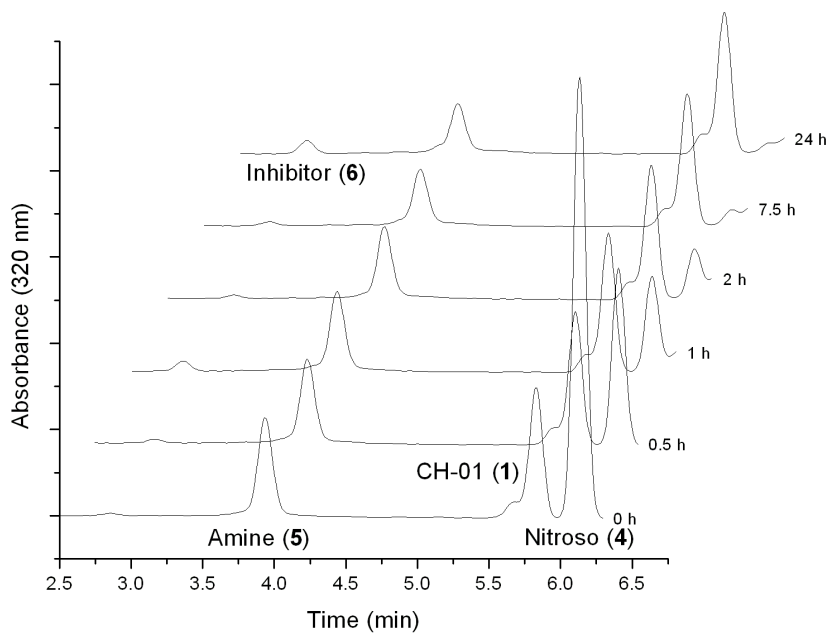

**Figure S4.** (A) Reduction of **1** using zinc powder and 10% ammonium chloride in DMF was monitored at 0, 1 and 16 h. The new peaks were identified as the corresponding amine and nitroso reduction products. An injection that contained the active inhibitor **6** as an internal control showed that none of the peaks correlated to **6**, confirming that release of **6** was not observed under these conditions. (B) The T = 1 h aliquot from the zinc reduction was injected into potassium phosphate buffer pH 7.4 and incubated at 37 °C. HPLC analysis of the formed precipitate reveals loss of the nitroso **4** and amine **5**.

### **Docking with AutoDock Vina (version 1.1.2):**

#### **Preparation of the receptors:**

The receptors (PDB IDs: 2BRB and 3K5U) were initially prepared by adding polar hydrogens at pH 7.4 using Protonate3D in Molecular Operating Environment (MOE) 2011.10. Gasteiger charges were then assigned using AutoDock's graphical user interface AutoDockTools (ADT; version 1.5.4). Following the addition of Gasteiger charges, ADT was implemented to build a "united atom model" of the receptor by merging non-polar hydrogens and adding their partial charges to their parent carbon atoms.

#### **Preparation of the ligands:**

The ligands were prepared by adding polar hydrogens at pH 7.4 using Protonate3D in MOE. MOE then assigned Gasteiger charges, before performing an energy minimisation using an MMFF94x forcefield with a 0.05 gradient. AutoDock's graphical user interface AutoDockTools (ADT; version 1.5.4) was subsequently used to build a "united atom model" of the ligands, by merging non-polar hydrogens and adding their partial charges to their parent carbon atoms.

#### **Individual docking with AutoDock Vina (version 1.1.2):**

The search space for docking into the receptor 2BRB was defined as a cubic box with dimensions 18.75 Å × 18.75 Å × 18.75 Å and center x = 17.238, y = -2.877, z = 10.364. The exhaustiveness and number of modes were both set to 20 and all other parameters were kept at their default values.

The search space for docking into the receptor 3K5U was defined as a cubic box with dimensions 18.75 Å × 18.75 Å × 18.75 Å and center x = -5.496, y = -31.095, z = 6.03. The exhaustiveness and number of modes were both set to 20 and all other parameters were kept at their default values.

## General Experimental

**<sup>1</sup>H NMR** spectra were recorded on Bruker DPX400 or DQX400 (400 MHz) or Bruker AVII 500 (500 MHz) using deuteriochloroform (unless indicated otherwise) as a reference for internal deuterium lock. The chemical shift data for each signal are given as δH in units of parts per million (ppm) relative to tetramethylsilane (TMS) where δH (TMS) = 0.00 ppm. The multiplicity of each signal is indicated by: s (singlet); br s (broad singlet); d (doublet); t (triplet); q (quartet); dd (doublet of doublets); combinations thereof; or m (multiplet). The number of protons (n) for a given resonance signal is indicated by nH. Coupling constants (*J*) are quoted in Hz and are recorded to the nearest 0.1 Hz. Identical proton coupling constants (*J*) are averaged in each spectrum and reported to the nearest 0.1 Hz. The coupling constants are determined by analysis using Bruker TopSpin software.

**<sup>13</sup>C NMR** spectra were recorded on Bruker DQX400 (100 MHz) or Bruker AVII 500 (126 MHz) spectrometers with broadband proton decoupling and internal deuterium lock. The chemical shift data for each signal are given as δC in units of parts per million (ppm) relative to tetramethylsilane (TMS) where δC (TMS) = 0.00 ppm.

**Mass spectra** were acquired on a VG platform spectrometer. Electrospray ionization spectra were obtained on Micromass LCT Premier and Bruker MicroTOF spectrometers, operating in positive or negative mode, from solutions of methanol.  $m/z$  values are reported in Daltons and followed by their percentage abundance in parentheses.

**Melting points** were determined using a Kofler hot stage microscope and are uncorrected.

**Microanalyses** were obtained at the Elemental Analysis Service, London Metropolitan University, London.

**Infrared Spectra** were obtained from neat samples, either as solids or liquids, using a diamond ATR module. The spectra were recorded on a Bruker Tensor 27 spectrometer. Absorption maxima are reported in wavenumbers ( $\text{cm}^{-1}$ ).

**Analytical thin layer chromatography (TLC)** was carried out on Merck silica gel 60 F<sub>254</sub> aluminum-supported thin layer chromatography sheets. Visualization was by absorption of UV light ( $\lambda_{\text{max}}$  254 nm), or thermal development after dipping in one of: **a** ethanolic solution of phosphomolybdic acid (PMA), ninhydrin or 4-anisaldehyde; **b** aqueous solution of cerium-ammonium-molybdate and sulfuric acid or potassium permanganate, potassium carbonate and sodium hydroxide.

**Flash Column chromatography** was carried out on VWR Prolabo silica gel 60 (240-400 mesh), eluting with solvents as supplied, under a positive pressure of compressed air (unless otherwise stated).

**Anhydrous solvents** Anhydrous  $\text{CH}_2\text{Cl}_2$ ,  $\text{Et}_2\text{O}$ , toluene, and THF were obtained using a Dalek drying column, where solvent was dried by passage

through filter columns and dispensed under an atmosphere of N<sub>2</sub> gas, before being stored over activated 3 Å molecular sieves under a N<sub>2</sub> atmosphere. Dry *N,N*-dimethylformamide was purchased from SigmaAldrich UK in SureSeal™ bottles and used without further purification as was dry 1,4-dioxane which was purchased from Fluka UK. All other solvents were used as supplied (analytical or HPLC grade) without purification.

**Chemicals** were purchased from Acros UK, Sigma Aldrich UK, Alfa Aesar UK, Fisher UK, Fluka UK, Fluorochem, Merck or TCI-Europe. All solvents and reagents were purified, when necessary, by standard techniques. Where appropriate and if not stated otherwise, all non-aqueous reactions were performed in a flame-dried flask under an inert atmosphere of nitrogen or argon.

***In vacuo*** refers to the use of a rotary evaporator attached to a diaphragm pump. Brine refers to a saturated aqueous solution of sodium chloride. Petroleum ether refers to the fraction boiling between 30–40 °C unless otherwise stated.

## Experimental Procedures

### *2-Amino-4,5-diphenylfuran-3-carbonitrile (8)*

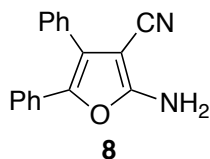

Benzoin (**7**, 5.00 g, 23.5 mmol, 1.0 eq), malononitrile (2.02 g, 30.6 mmol, 1.3 eq) and diethylamine (0.95 mL, 9.19 mmol, 0.4 eq) were added to dry dioxane (25 mL) stirring over 4 Å molecular sieves. The reaction vessel was covered with foil and heated under reflux overnight under an atmosphere of argon. The



reaction solution was filtered and the filtrate concentrated *in vacuo*. The resulting residue was crystallized from dioxane to yield (**8**) (4.60 g, 75%) as a beige solid:  $R_f$  0.3 (1:4 ethyl acetate/petroleum ether); mp 204–207 °C (dioxane) (lit. 204–206 °C [dioxane]);<sup>2</sup>  $\nu_{\max}$  (neat)  $\text{cm}^{-1}$ : 3457, 2215;  $^1\text{H}$  NMR (500 MHz; DMSO- $\text{D}_6$ ):  $\delta$  7.72 (s, 2H), 7.49–7.39 (m, 5H), 7.29–7.17 (m, 5H, Ar CH);  $^{13}\text{C}$  NMR (126 MHz; DMSO- $\text{D}_6$ ):  $\delta$  163.5, 136.6, 131.2, 129.4, 129.0, 128.9, 128.6, 128.3, 126.9, 124.2, 121.8, 115.5, 69.2; (ESI<sup>+</sup>)  $m/z$  543.18 ([2M + Na]<sup>+</sup>, 100%). These data are in good agreement with literature values.<sup>1</sup>

#### 5,6-Diphenylfuro[2,3-d]pyrimidin-4(3H)-one (**10**)

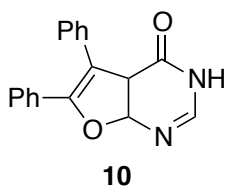

Formic acid (13.85 mL, 367.1 mmol) was added to acetic anhydride (13.85 mL, 146.8 mmol) stirring over 4 Å molecular sieves. The reaction solution was stirred at 60 °C for 2 h, generating acetic formic anhydride as a colorless liquid. Compound **8** (3.00 g, 11.5 mmol, 1.0 eq) was added to the acetic formic anhydride and the resulting solution heated to 85 °C for 6 h. The solution was filtered and adjusted to pH 6 using aqueous NaOH (2 M). The filtrate was extracted with  $\text{CH}_2\text{Cl}_2$  (50 mL) and the organic layer washed with distilled water (3 × 50 mL). The organic layer was dried over  $\text{MgSO}_4$ , filtered and concentrated *in vacuo*. The resulting residue took the form of a brown solid (2.77 g), containing **9** { $m/z$  (ES<sup>+</sup>) 311 ([M+Na]<sup>+</sup>, 100%)}, and was used without further purification.

The brown solid (3.79 g) containing **9** was heated to 220 °C for 30 min. The resulting solid was crystallized from methanol to yield **10** (1.70 g, 51% over two steps) as a brown solid:  $R_f$  0.2 (3:7 ethyl acetate:petroleum ether); mp 258–260 °C (MeOH) (lit. > 240 °C [MeOH]);<sup>2</sup>  $\nu_{\max}$  (neat)  $\text{cm}^{-1}$ : 3443, 1675;  $^1\text{H}$  NMR (500 MHz; DMSO- $\text{D}_6$ ):  $\delta$  12.65 (s, 1H), 8.17 (s, 1H), 7.45–7.33 (m, 10H);  $^{13}\text{C}$  NMR (126 MHz; DMSO- $\text{D}_6$ ):  $\delta$  164.6, 159.0, 148.0, 146.8, 131.7, 131.0, 129.9, 129.62, 129.55, 129.2, 128.8, 127.2, 119.5, 108.9; (ESI<sup>+</sup>)  $m/z$  599.18 ([2M + Na]<sup>+</sup>, 100%). These data are in good agreement with literature values.<sup>2</sup>

#### 4-Chloro-5,6-diphenylfuro[2,3-d]pyrimidine (**11**)

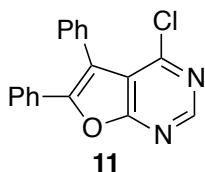

Phosphorus(V) oxychloride (9.93 mL, 106.53 mmol, 30.7 eq) was added to dry **10** (1.00 g, 3.47 mmol, 1.0 eq). The reaction solution was stirred at 55 °C under argon for 2 h, then quenched by pouring over crushed ice and adjusted to pH 7 using a saturated aqueous solution of  $\text{Na}_2\text{CO}_3$ . The product was extracted with  $\text{CH}_2\text{Cl}_2$  (100 mL) and washed with distilled water (3 × 50 mL). The organic layer was dried over  $\text{MgSO}_4$ , filtered and concentrated *in vacuo*. The resulting residue was adsorbed onto silica gel and purified using silica gel column chromatography (elution: 1:9:90 triethylamine:ethyl acetate:petroleum ether) to give **11** (0.86 g, 81%) as a pale yellow solid:  $R_f$  0.9 (1:4 ethyl acetate:petroleum ether); mp 103–105 °C (ethyl acetate/petroleum ether) (lit. 121–122 °C);<sup>2</sup>  $^1\text{H}$  NMR (500 MHz;

DMSO-D<sub>6</sub>):  $\delta$  8.86 (s, 1H), 7.53–7.40 (m, 10H); <sup>13</sup>C NMR (126 MHz; DMSO-D<sub>6</sub>):  $\delta$  165.3, 153.0, 151.7, 150.9, 130.5, 130.1, 129.9, 129.0, 128.8, 128.0, 126.9, 118.4, 115.0; *m/z* (ES<sup>+</sup>) 307 ([M+H]<sup>+</sup>, 100%). These data are in good agreement with literature values.<sup>2</sup>

2-(5,6-Diphenylfuro[2,3-d]pyrimidin-4-ylamino)ethanol (**6**)

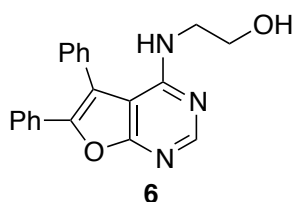

Chloride **11** (0.70 g, 2.29 mmol, 1.0 eq) and ethanolamine (0.30 mL, 5.03 mmol, 2.2 eq) were added to ethanol (7 mL). The reaction was heated under reflux for 6 h and then concentrated *in vacuo*. The resulting residue was adsorbed onto Celite<sup>®</sup> and purified by silica gel column chromatography, eluting with Et<sub>3</sub>N, MeOH, ethyl acetate and petroleum ether (1:4:30:65) to afford **6** (0.72 g, 95%) as a beige solid: *R<sub>f</sub>* 0.3 (1:4:30:65 Et<sub>3</sub>N:MeOH:ethyl acetate:petroleum ether); mp 154–157 °C (ethyl acetate/petroleum ether) (lit. 163–165 °C);<sup>2</sup> <sup>1</sup>H NMR (500 MHz; CDCl<sub>3</sub>):  $\delta$  8.32 (s, 1H, 3.56), 7.52–7.22 (m, 10H), 5.16 (t, *J* = 5.2, 1H), 4.18 (br s, 1H), 3.72 (t, *J* = 4.2, 2H), 3.56 (dt, *J* = 5.2, 4.6, 2H); <sup>13</sup>C NMR (126 MHz; CDCl<sub>3</sub>):  $\delta$  164.7, 157.9, 153.6, 147.0, 132.1, 129.72, 129.70, 129.3, 129.0, 128.5, 128.5, 126.4, 114.9, 103.3, 62.4, 44.2; *m/z* (ES<sup>+</sup>) 333 (100%), 332 ([M+H]<sup>+</sup>, 98%), 370 ([M+K]<sup>+</sup>, 78%). These data are in good agreement with literature values.<sup>2</sup>

## 2-(2-([4-Nitrobenzyl]oxy)ethyl)isoindoline-1,3-dione

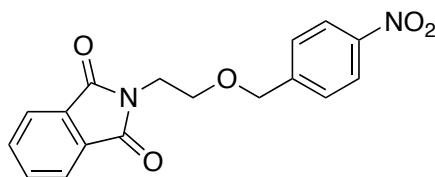

Sodium hydride (0.63 g 60% dispersion in mineral oil, 15.69 mmol, 1.5 eq) was added to a stirred solution of *N*-(2-hydroxyethyl)phthalimide (2.00 g, 10.46 mmol, 1.0 eq) in dry THF (20 mL). The reaction mixture was stirred for 15 min under argon at ambient temperature and then 4-nitrobenzyl bromide (3.39 g, 15.69 mmol, 1.5 eq) and TBAI (0.39 g, 1.05 mmol, 0.1 eq) were added. The reaction mixture was stirred at ambient temperature for a further 24 h, quenched by the addition of methanol (20 mL) and the solvents removed *in vacuo*. The residue was dissolved in CH<sub>2</sub>Cl<sub>2</sub> (50 mL), washed with distilled water (3 × 50 mL) and the organic layer dried over MgSO<sub>4</sub>, filtered and concentrated *in vacuo*. The resulting residue was purified by silica gel column chromatography, eluting with ethyl acetate and petroleum ether (20:80) to afford 2-(2-([4-nitrobenzyl]oxy)ethyl)isoindoline-1,3-dione (0.78 g, 23%) as a yellow solid: R<sub>f</sub> 0.2 (1:4 ethyl acetate:petroleum ether); mp 142–143 °C (ethyl acetate/petroleum ether);  $\nu_{\text{max}}$  (neat) cm<sup>-1</sup>: 1739, 1515, 1366; <sup>1</sup>H NMR (500 MHz; CDCl<sub>3</sub>):  $\delta$  8.12 (d, *J* = 8.7, 2H), 7.87–7.85 (m, 2H), 7.74–7.73 (m, 2H), 7.43 (d, *J* = 8.7, 2H), 4.63 (s, 2H), 3.98 (t, *J* = 5.6, 2H), 3.80 (t, *J* = 5.6); <sup>13</sup>C NMR (126 MHz; CDCl<sub>3</sub>):  $\delta$  168.2, 147.3, 145.5, 134.1, 132.0, 127.6, 123.6, 123.3, 71.4, 67.7, 37.4; HRMS *m/z* (ESI<sup>+</sup>) found [M+Na]<sup>+</sup> 349.0791, C<sub>17</sub>H<sub>14</sub>N<sub>2</sub>O<sub>5</sub>Na requires [M+Na]<sup>+</sup> 349.0795; *m/z*

(ES<sup>+</sup>) 349 ([M+Na]<sup>+</sup>, 100%), 675 ([2M+Na]<sup>+</sup>, 42%). Anal. Calcd for C<sub>17</sub>H<sub>14</sub>N<sub>2</sub>O<sub>5</sub>: C, 62.6; H, 4.3; N, 8.6. Found C, 62.5; H, 4.4; N, 8.5.

**2-([4-Nitrobenzyl]oxy)ethanamine (12)**

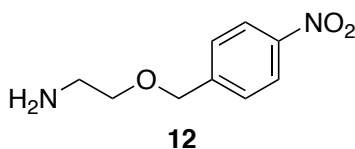

Hydrazine monohydrate (1.98 g, 1.92 mL, 39.6 mmol, 43.1 eq) was added to a solution of 2-(2-([4-nitrobenzyl]oxy)ethyl)isoindoline-1,3-dione (0.30 g, 0.92 mmol, 1.0 eq.) in ethanol (20 mL). The reaction mixture was stirred at ambient temperature for three days under argon then filtered, washed with ethanol and the filtrate concentrated *in vacuo*. The resulting residue was dissolved in CH<sub>2</sub>Cl<sub>2</sub> (20 mL) and washed with aqueous HCl (2 M, 2 × 20 mL). The aqueous phases were combined, washed with diethyl ether (2 × 20 mL) and then adjusted to pH > 11 using NaOH pellets. The organic material was extracted from this mixture with CH<sub>2</sub>Cl<sub>2</sub> (20 mL), the combined CH<sub>2</sub>Cl<sub>2</sub> layers dried over MgSO<sub>4</sub>, filtered and the solvent was removed *in vacuo* to yield 2-([4-nitrobenzyl]oxy)ethanamine (**12**) (0.14 g, 80%) as an orange liquid: *R*<sub>f</sub> 0.2 (2:3, ethyl acetate:petroleum ether); *v*<sub>max</sub> (CHCl<sub>3</sub>) cm<sup>-1</sup>: 1518, 1345; <sup>1</sup>H NMR (400 MHz; CDCl<sub>3</sub>): δ 8.11 (d, *J* = 8.6, 2H), 7.44 (d, *J* = 8.6, 2H), 4.57 (s, 2H), 3.50 (t, *J* = 5.2, 2H), 2.86 (t, *J* = 5.2, 2H); <sup>13</sup>C NMR (100 MHz; CDCl<sub>3</sub>): δ 147.2, 146.1, 127.6, 123.5, 73.1, 71.7, 41.8; HRMS *m/z* (ESI<sup>+</sup>) found [M+H]<sup>+</sup> 197.0929, C<sub>9</sub>H<sub>13</sub>N<sub>2</sub>O<sub>3</sub> requires [M+H]<sup>+</sup> 197.0921; *m/z* (ES<sup>+</sup>) 197 ([M+H]<sup>+</sup>, 100%).

*N*-(2-([4-Nitrobenzyl]oxy)ethyl)-5,6-diphenylfuro[2,3-*d*]pyrimidin-4-amine (**1**)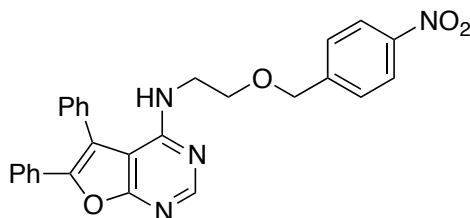**1**

A solution of **11** (0.05 g, 0.17 mmol, 1.0 eq), amine **12** (0.07 g, 0.38 mmol, 2.2 eq) and Et<sub>3</sub>N (0.05 mL, 0.38 mmol, 2.2 eq) in DMF (3 mL) was stirred at 80 °C under nitrogen for 6 h and then concentrated *in vacuo*. The resulting residue was dissolved in CH<sub>2</sub>Cl<sub>2</sub> (20 mL) and washed with distilled water (3 × 20 mL). The organic layer was dried over MgSO<sub>4</sub>, filtered and concentrated *in vacuo* and the resulting residue purified by silica gel chromatography, eluting with Et<sub>3</sub>N, MeOH, ethyl acetate and petroleum ether (1:4:20:75) to afford *N*-(2-([4-nitrobenzyl]oxy)ethyl)-5,6-diphenylfuro[2,3-*d*]pyrimidin-4-amine (**1**) (0.1 g, 93%) as a yellow solid: R<sub>f</sub> 0.2 (1:1, ethyl acetate:petroleum ether); mp 127–129 °C (ethyl acetate); ν<sub>max</sub> (neat) cm<sup>-1</sup>: 3426, 1520, 1340; <sup>1</sup>H NMR (400 MHz; CDCl<sub>3</sub>): δ 8.42 (s, 1H), 8.22 (d, *J* = 8.7, 2H), 7.52–7.27 (m, 10H), 7.35 (d, *J* = 8.7, 2H), 5.12 (t, *J* = 5.2, 1H), 4.51 (s, 2H), 3.74 (dt, *J* = 5.2, 5.2, 2H), 3.61 (t, *J* = 5.2, 2H); <sup>13</sup>C NMR (126 MHz; CDCl<sub>3</sub>): δ 165.0, 157.4, 154.0, 147.4, 146.9, 145.4, 132.4, 129.7, 129.5, 129.4, 128.7, 128.5, 127.5, 126.4, 123.6, 114.8, 103.3, 71.7, 69.3, 40.4; HRMS *m/z* (ESI<sup>-</sup>) [Found: [M-H]<sup>-</sup> 465.1575, C<sub>27</sub>H<sub>21</sub>N<sub>4</sub>O<sub>4</sub> requires [M-H]<sup>-</sup> 465.1568]; *m/z* (ES<sup>-</sup>) 465 ([M-H]<sup>-</sup>, 100%); Anal. Calcd for C<sub>27</sub>H<sub>22</sub>N<sub>4</sub>O<sub>4</sub>: C, 69.5; H, 4.8; N, 12.0. Found C, 69.4; H, 4.6; N, 11.9.

**1-(Ethoxymethyl)-4-nitrobenzene (13)**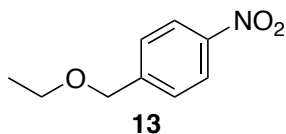

Anhydrous ethanol (6 mL) was added to dry THF (30 mL) and the solution cooled with an ice-water bath. Sodium hydride was then added in portions and the resulting mixture left to stir at the ambient temperature for 10 min. This mixture was syringed drop wise into an ice-cooled solution of 4-nitrobenzylbromide (1.0 g, 4.62 mmol) in dry THF (20 mL) and the reaction left stirring at the ambient temperature for an additional 2 h. A saturated aqueous solutions of  $\text{NH}_4\text{Cl}$  was added, the mixture concentrated *in vacuo* and then re-dissolved in EtOAc. This solution washed with brine, dried over anhydrous  $\text{MgSO}_4$ , filtered and the solvent removed *in vacuo*. Purification by column chromatography eluting with petroleum ether and ethyl acetate (gradient: 10:0 to 9:1) gave 1-(ethoxymethyl)-4-nitrobenzene (**13**) as a yellow oil (161 mg, 19%):  $R_f$  0.4 (1:10 ethyl acetate:petroleum ether);  $^1\text{H NMR}$  (400 MHz,  $\text{CDCl}_3$ ):  $\delta$  8.21 (d,  $J = 8.1$ , 2H), 7.51 (d,  $J = 8.1$ , 2H), 4.61 (s, 2H), 3.60 (q,  $J = 7.0$ ), (t,  $J = 7.0$ );  $m/z$  ( $\text{FI}^+$ ) 181.07 ( $[\text{M}]^+$ , 100%). These data are in good agreement with literature values.<sup>3</sup>

## References

1. Johannsen, F.; Jorgensen, A.; Pedersen, E. B., Reactions of Heterocyclic Ortho-Aminonitriles with Acetic Formic Anhydride. *Chem. Scripta* **1986**, *26*, 347-351.
2. Foloppe, N.; Fisher, L. M.; Howes, R.; Kierstan, P.; Potter, A.; Robertson, A. G.; Surgenor, A. E., Structure-based design of novel Chk1 inhibitors: insights into hydrogen bonding and protein-ligand affinity. *J. Med. Chem.* **2005**, *48*, 4332-4345.
3. Joshi, G.; Adimurthy, S., New Method for the Synthesis of Benzyl Alkyl Ethers Mediated by FeSO<sub>4</sub>. *Synth. Commun.* **2011**, *41*, 720-728.



# <sup>1</sup>H and <sup>13</sup>C NMR Spectra

## 2-Amino-4,5-diphenylfuran-3-carbonitrile (**8**) – <sup>1</sup>H NMR spectrum

Instrument AVC500  
Group SJC  
5087 Diane Swallow 14/7/11

NAME (1) ds50871407  
EXPNO 1  
PROCNO 1  
Date\_ 20110714  
Time\_ 9.49  
INSTRUM avc500  
PROBHD 5 mm CPDUL 13C  
PULPROG zg30  
TD 65536  
SOLVENT DMSO  
NS 16  
DS 2  
SWH 10330.578 Hz  
FIDRES 0.157632 Hz  
AQ 3.1719923 sec  
RG 4  
DW 48.400 usec  
DE 6.00 usec  
TE 298.0 K  
D1 1.00000000 sec  
TD0 1

===== CHANNEL f1 =====  
NUC1 1H  
P1 9.60 usec  
PL1 -6.00 dB  
PL1W 15.19999981 W  
SFO1 500.3030896 MHz  
SI 32768  
SF 500.3000000 MHz  
WDW EM  
SSB 0  
LB 0.30 Hz  
GB 0  
PC 1.00

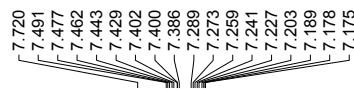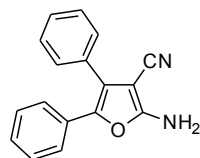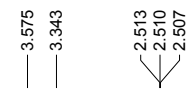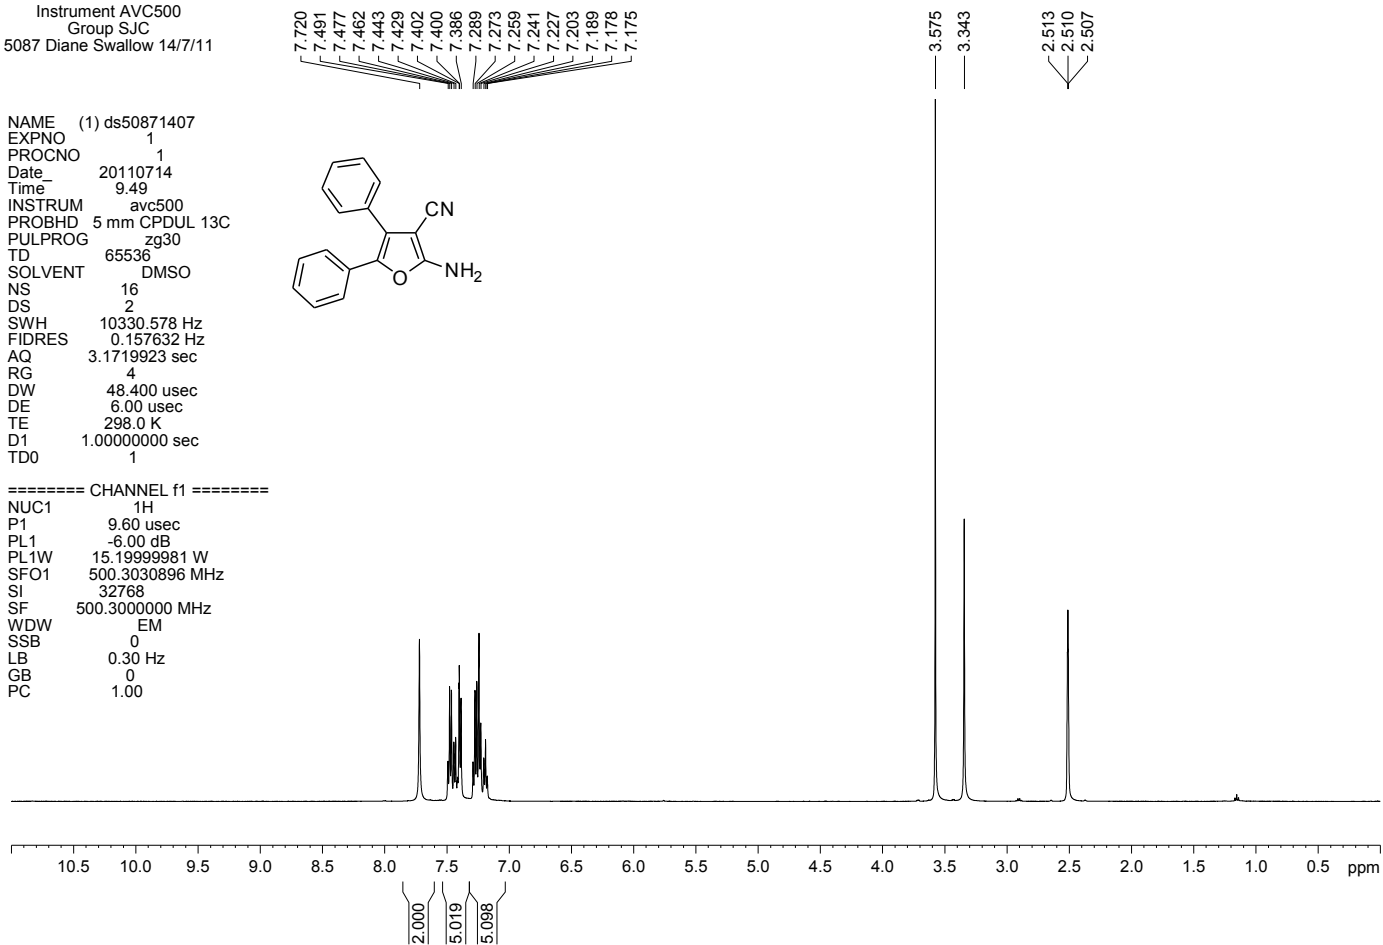

2-Amino-4,5-diphenylfuran-3-carbonitrile (**8**) – <sup>13</sup>C NMR spectrum

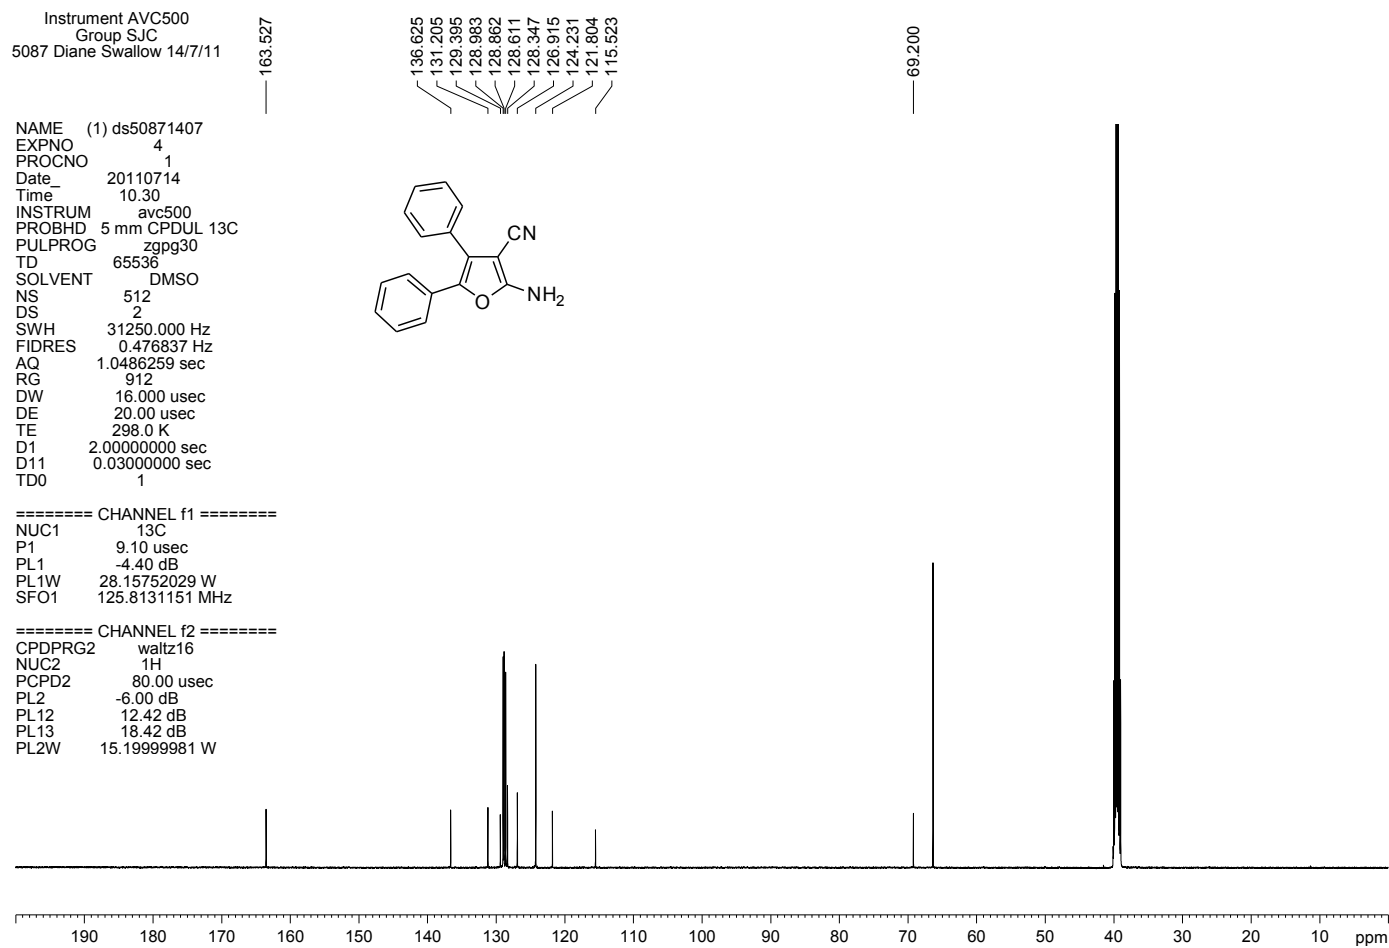

5,6-Diphenylfuro[2,3-d]pyrimidin-4(3H)-one (**10**) – <sup>1</sup>H NMR spectrum

Instrument DQX400  
 Chemist ds  
 Group sjc  
 3C  
 acq.au DMSO {C:\NMR} sjcgrp

NAME (2) - Jan21-2010-18  
 EXPNO 1  
 PROCNO 1  
 Date\_ 20100122  
 Time 2.08  
 INSTRUM av400  
 PROBHD 5 mm QNP 1H/13  
 PULPROG zg60  
 TD 65536  
 SOLVENT DMSO  
 NS 16  
 DS 2  
 SWH 8278.146 Hz  
 FIDRES 0.126314 Hz  
 AQ 3.9584243 sec  
 RG 256  
 DW 60.400 usec  
 DE 7.50 usec  
 TE 300.0 K  
 D1 1.0000000 sec

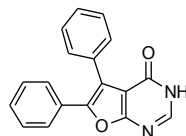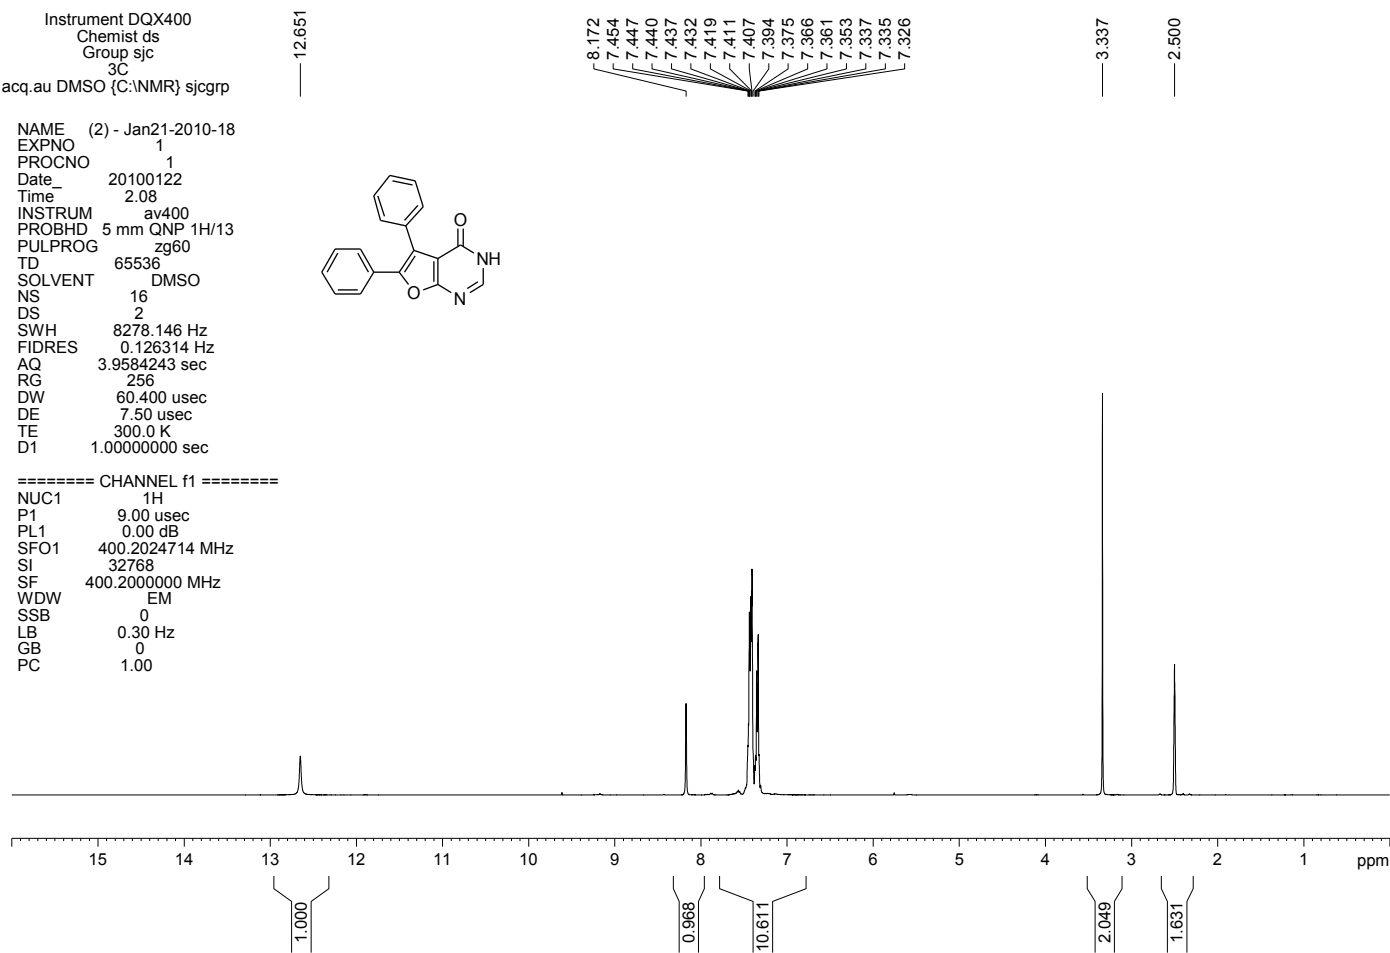

5,6-Diphenylfuro[2,3-d]pyrimidin-4(3H)-one (**10**) – <sup>13</sup>C NMR spectrum

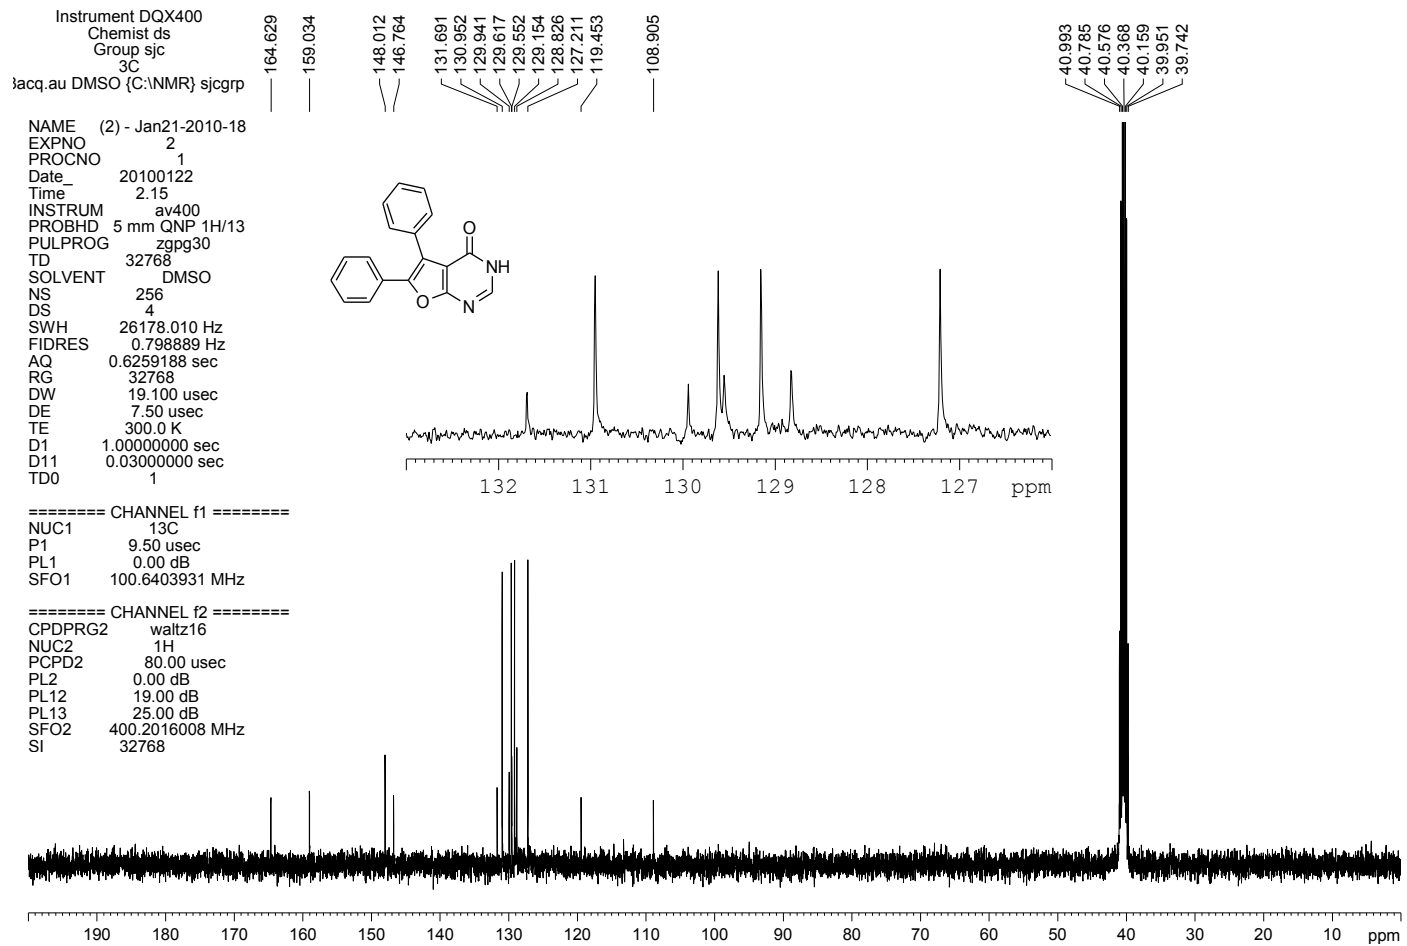

4-Chloro-5,6-diphenylfuro[2,3-d] pyrimidine (**11**) – <sup>1</sup>H NMR spectrum

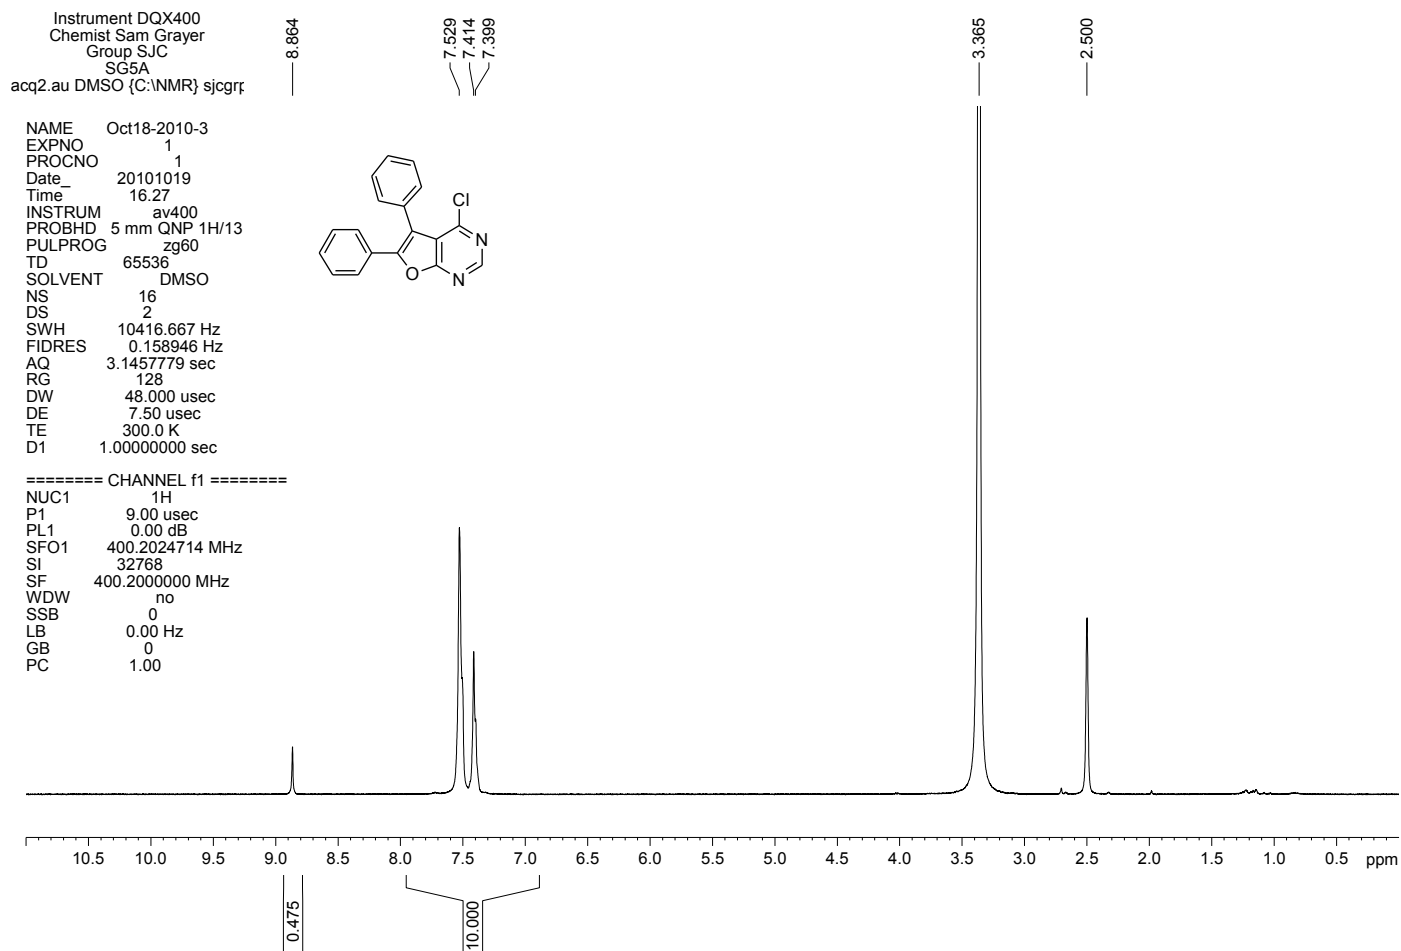

4-Chloro-5,6-diphenylfuro[2,3-d] pyrimidine (**11**) – <sup>13</sup>C NMR spectrum

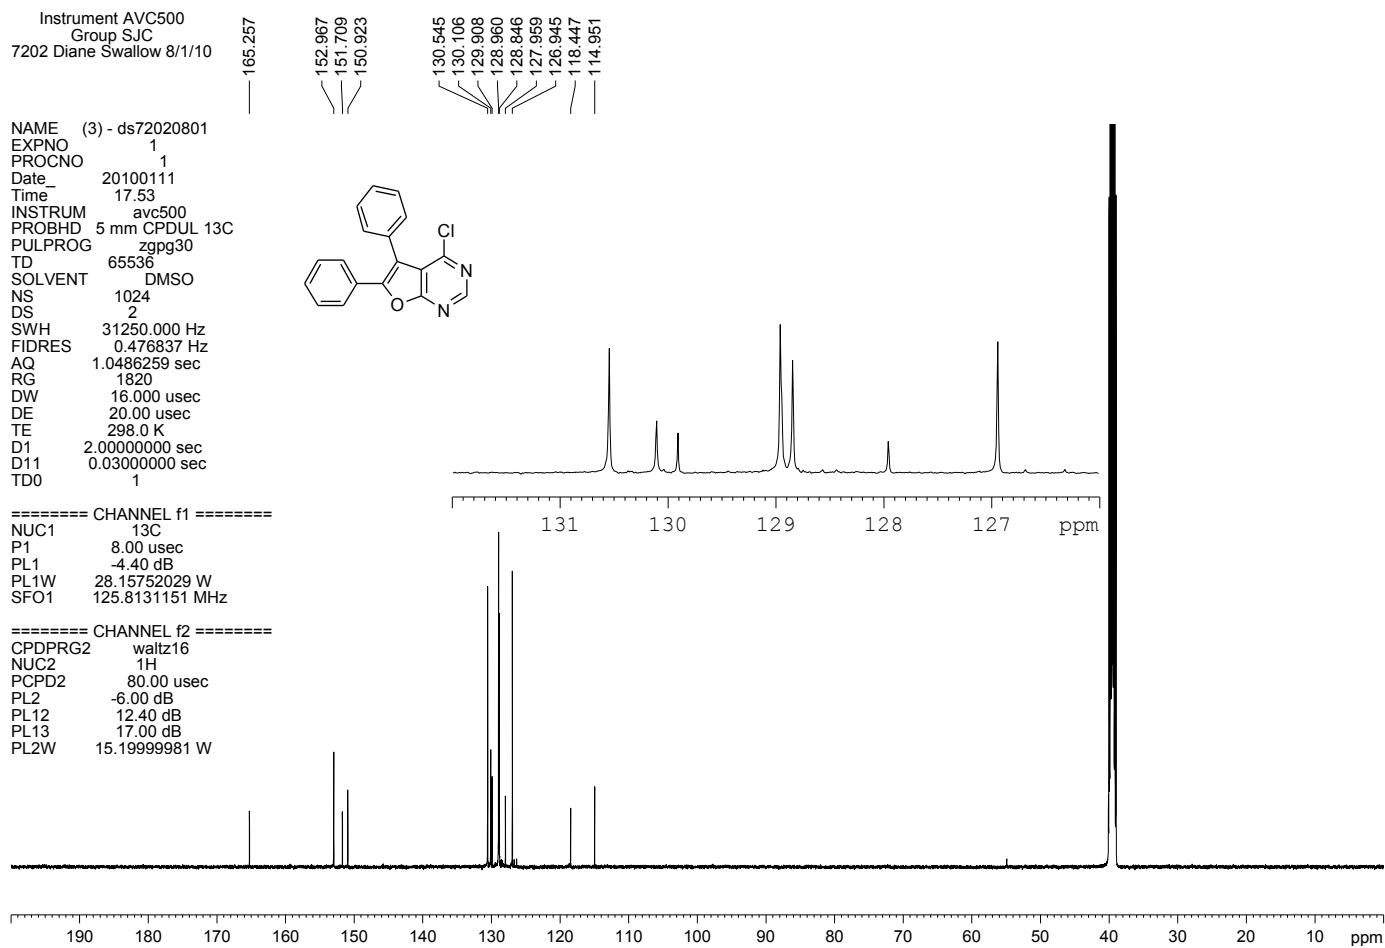

2-(5,6-Diphenylfuro[2,3-d]pyrimidin-4-ylamino)ethanol (**6**) – <sup>1</sup>H NMR spectrum

Instrument DQX400  
 Chemist ds  
 Group sjc  
 ds-3Y  
 xq.au CDCI3 [E:\NMR2012} sjcg

NAME (4) - Aug07-2012-7  
 EXPNO 1  
 PROCNO 1  
 Date\_ 20120808  
 Time 1.09  
 INSTRUM av400  
 PROBHD 5 mm QNP 1H/13  
 PULPROG zg60  
 TD 65536  
 SOLVENT CDCl3  
 NS 16  
 DS 2  
 SWH 8278.146 Hz  
 FIDRES 0.126314 Hz  
 AQ 3.9584243 sec  
 RG 40.3  
 DW 60.400 usec  
 DE 7.50 usec  
 TE 300.0 K  
 D1 1.0000000 sec

===== CHANNEL f1 =====

NUC1 1H  
 P1 9.00 usec  
 PL1 0.00 dB  
 SFO1 400.2024714 MHz  
 SI 32768  
 SF 400.2000028 MHz  
 WDW EM  
 SSB 0  
 LB 0.30 Hz  
 GB 0  
 PC 1.00

8.322  
 7.524  
 7.503  
 7.491  
 7.482  
 7.472  
 7.458  
 7.239  
 7.232  
 7.224  
 5.174  
 5.161  
 5.148  
 4.182  
 3.730  
 3.719  
 3.707  
 3.576  
 3.563  
 3.552  
 3.539

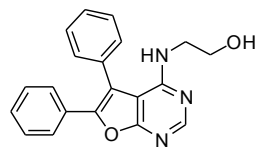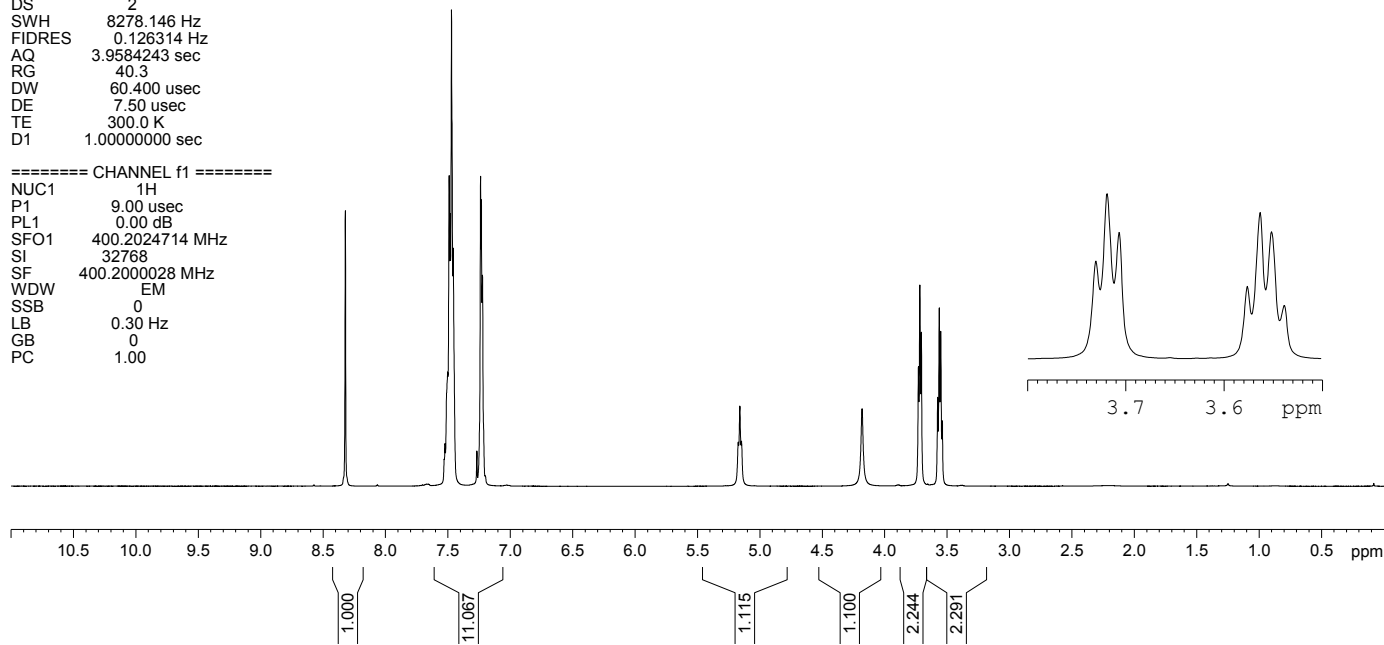

2-(5,6-Diphenylfuro[2,3-d]pyrimidin-4-ylamino)ethanol (**6**) – <sup>13</sup>C NMR spectrum

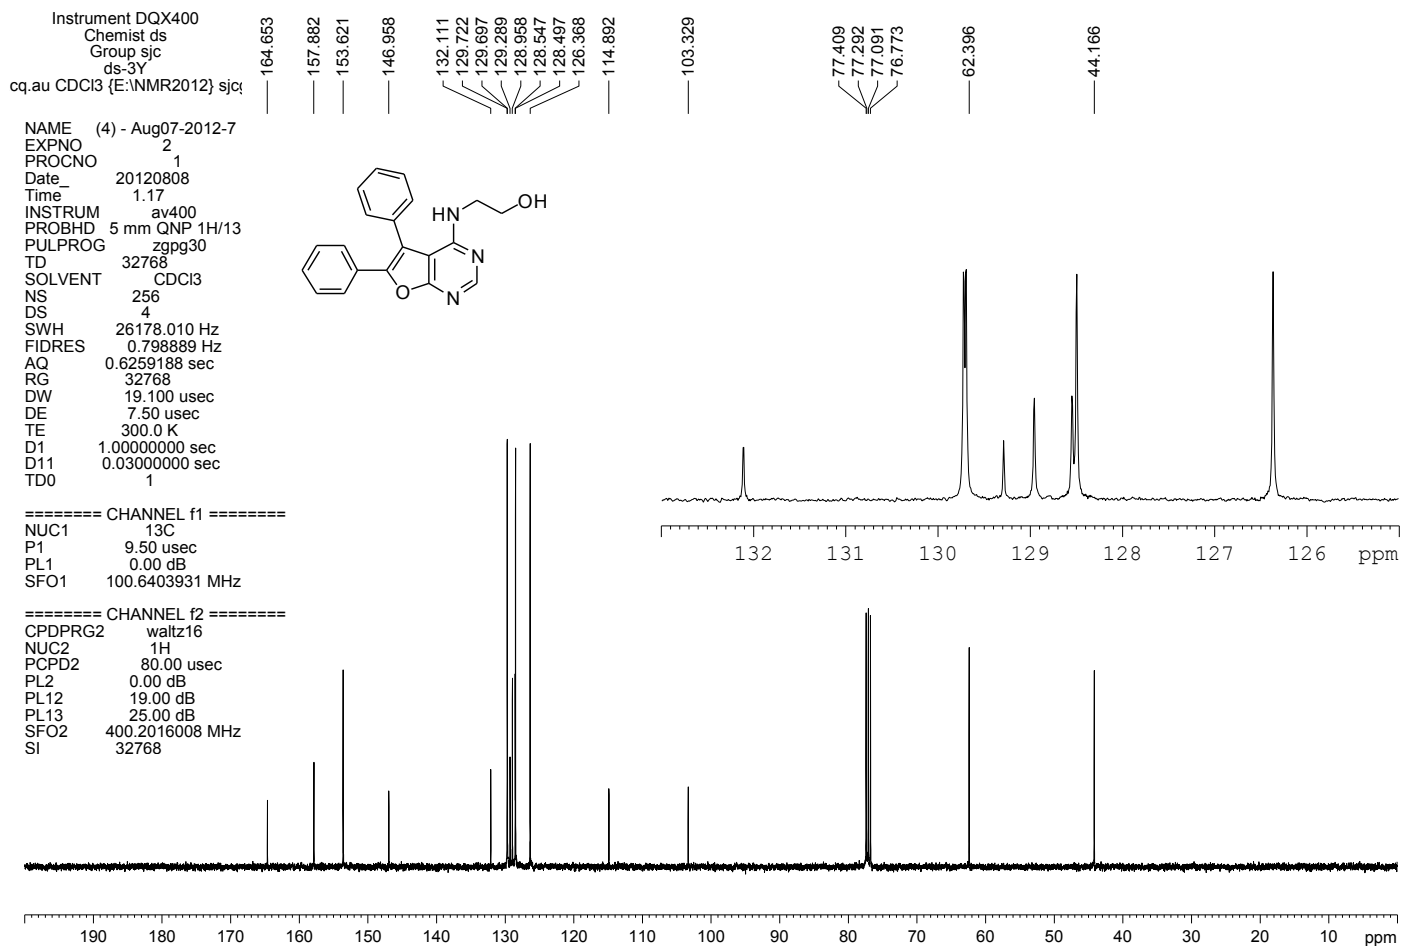



2-(2-(4-Nitrobenzyl)oxy)ethylisoindoline-1,3-dione – <sup>1</sup>H NMR spectrum

Instrument AVC500  
Group SJC  
3841 Sam Grayer 28/4/11

8.132  
8.114  
7.865  
7.859  
7.854  
7.848  
7.744  
7.738  
7.733  
7.727  
7.440  
7.423  
7.268

4.633  
3.989  
3.978  
3.966  
3.815  
3.804  
3.793

NAME sg38412804  
EXPNO 1  
PROCNO 1  
Date\_ 20110501  
Time 21.53  
INSTRUM avc500  
PROBHD 5 mm CPDUL 13C  
PULPROG zg30  
TD 65536  
SOLVENT CDCl3  
NS 16  
DS 2  
SWH 10330.578 Hz  
FIDRES 0.157632 Hz  
AQ 3.1719923 sec  
RG 4  
DW 48.400 usec  
DE 6.00 usec  
TE 298.0 K  
D1 1.0000000 sec  
TD0 1

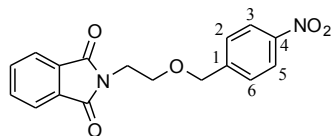

===== CHANNEL f1 =====  
NUC1 1H  
P1 9.60 usec  
PL1 -6.00 dB  
PL1W 15.19999981 W  
SFO1 500.3030896 MHz  
SI 32768  
SF 500.3000240 MHz  
WDW no  
SSB 0  
LB 0.00 Hz  
GB 0  
PC 1.00

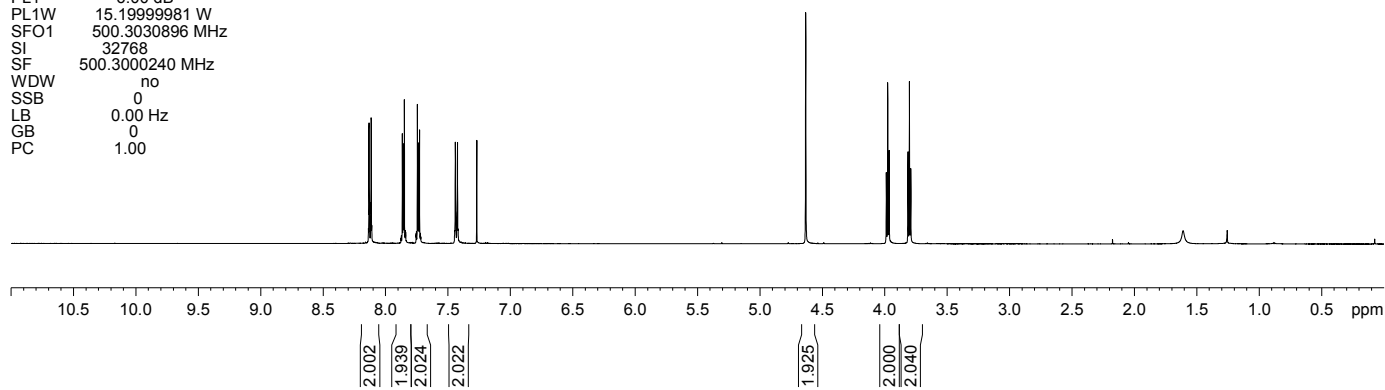

2-(2-([4-Nitrobenzyl]oxy)ethyl)isoindoline-1,3-dione – <sup>13</sup>C NMR spectrum

Instrument AVC500  
Group SJC  
3841 Sam Grayer 28/4/11

NAME sg38412804  
EXPNO 3  
PROCNO 1  
Date\_ 20110501  
Time 22.57  
INSTRUM avc500  
PROBHD 5 mm CPDUL 13C  
PULPROG zgpg30  
TD 65536  
SOLVENT CDCl3  
NS 1024  
DS 2  
SWH 31250.000 Hz  
FIDRES 0.476837 Hz  
AQ 1.0486259 sec  
RG 1820  
DW 16.000 usec  
DE 20.00 usec  
TE 298.0 K  
D1 2.0000000 sec  
D11 0.03000000 sec  
TD0 1

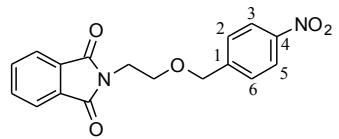

==== CHANNEL f1 =====  
NUC1 13C  
P1 9.10 usec  
PL1 -4.40 dB  
PL1W 28.15752029 W  
SFO1 125.8131151 MHz  
  
==== CHANNEL f2 =====  
CPDPRG2 waltz16  
NUC2 1H  
PCPD2 80.00 usec  
PL2 -6.00 dB  
PL12 12.42 dB  
PL13 18.42 dB  
PL2W 15.19999981 W

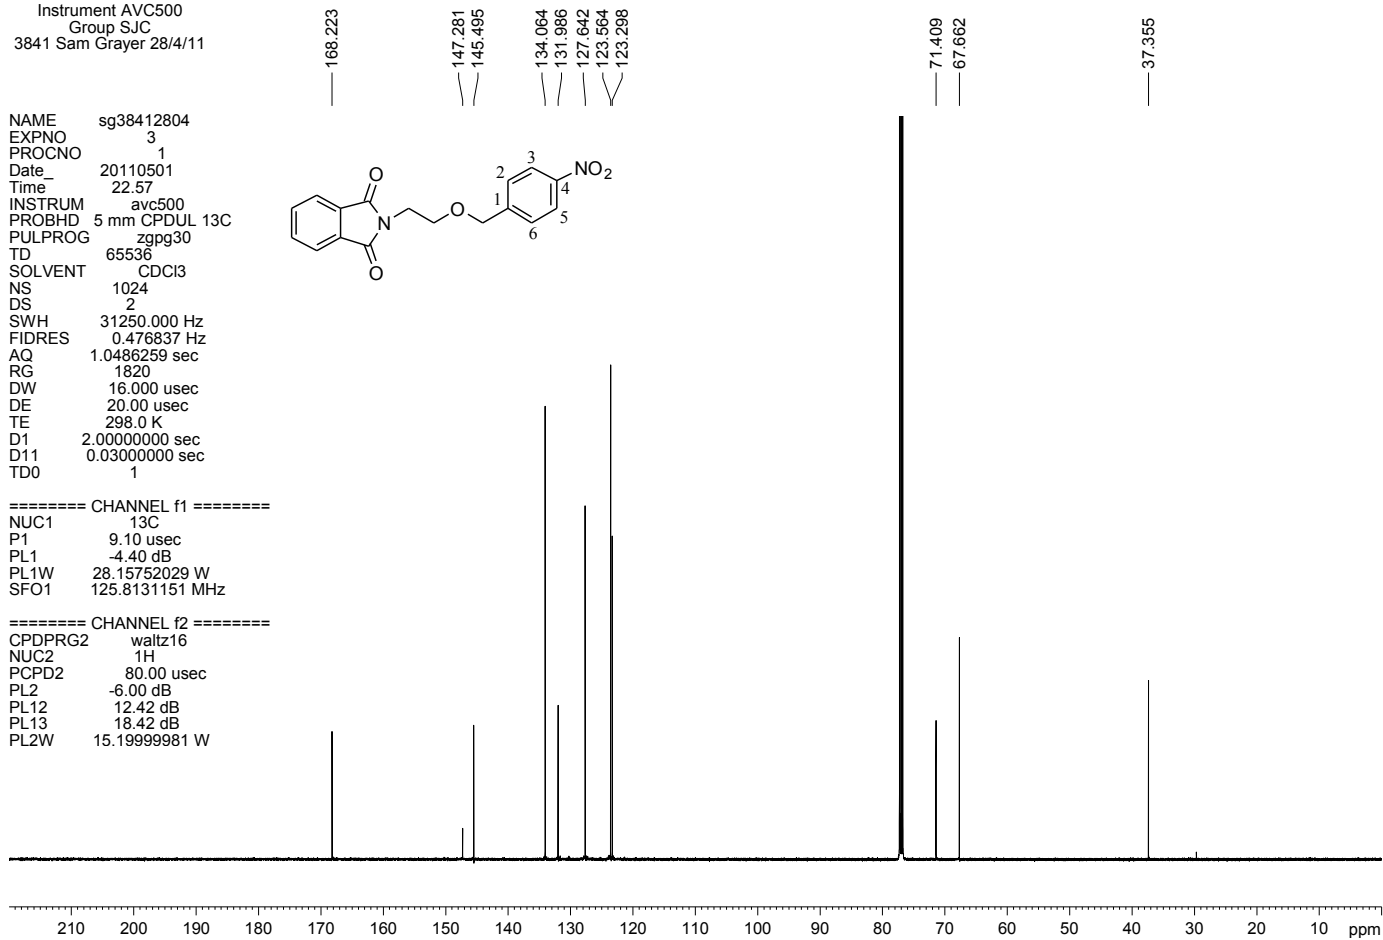

2-([4-Nitrobenzyl]oxy)ethanamine (**12**) – <sup>1</sup>H NMR spectrum

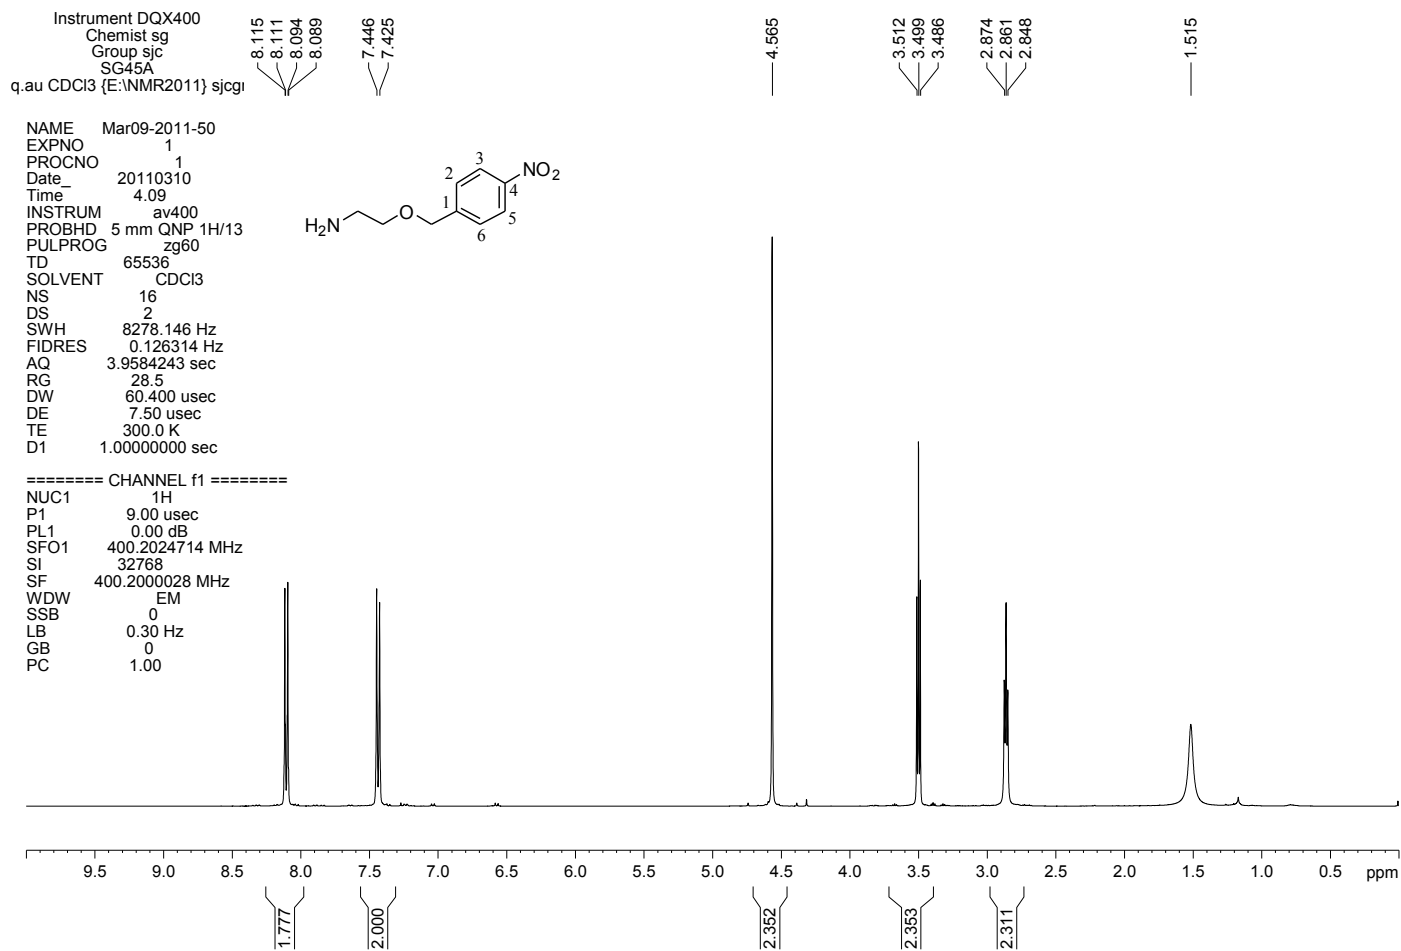

2-([4-Nitrobenzyl]oxy)ethanamine (**12**) – <sup>13</sup>C NMR spectrum

Instrument DQX400  
 Chemist sg  
 Group sjc  
 SG45A  
 xq.au CDCl3 [E:\NMR2011] sjcg

NAME Mar09-2011-50  
 EXPNO 2  
 PROCNO 1  
 Date\_ 20110310  
 Time 4.17  
 INSTRUM av400  
 PROBHD 5 mm QNP 1H/13  
 PULPROG zgpg30  
 TD 32768  
 SOLVENT CDCl3  
 NS 256  
 DS 4  
 SWH 26178.010 Hz  
 FIDRES 0.798889 Hz  
 AQ 0.6259188 sec  
 RG 32768  
 DW 19.100 usec  
 DE 7.50 usec  
 TE 300.0 K  
 D1 1.00000000 sec  
 D11 0.03000000 sec  
 TD0 1

===== CHANNEL f1 =====  
 NUC1 13C  
 P1 9.50 usec  
 PL1 0.00 dB  
 SFO1 100.6403931 MHz

===== CHANNEL f2 =====  
 CPDPRG2 waltz16  
 NUC2 1H  
 PCPD2 80.00 usec  
 PL2 0.00 dB  
 PL12 19.00 dB  
 PL13 25.00 dB  
 SFO2 400.2016008 MHz  
 SI 32768

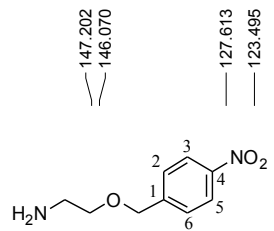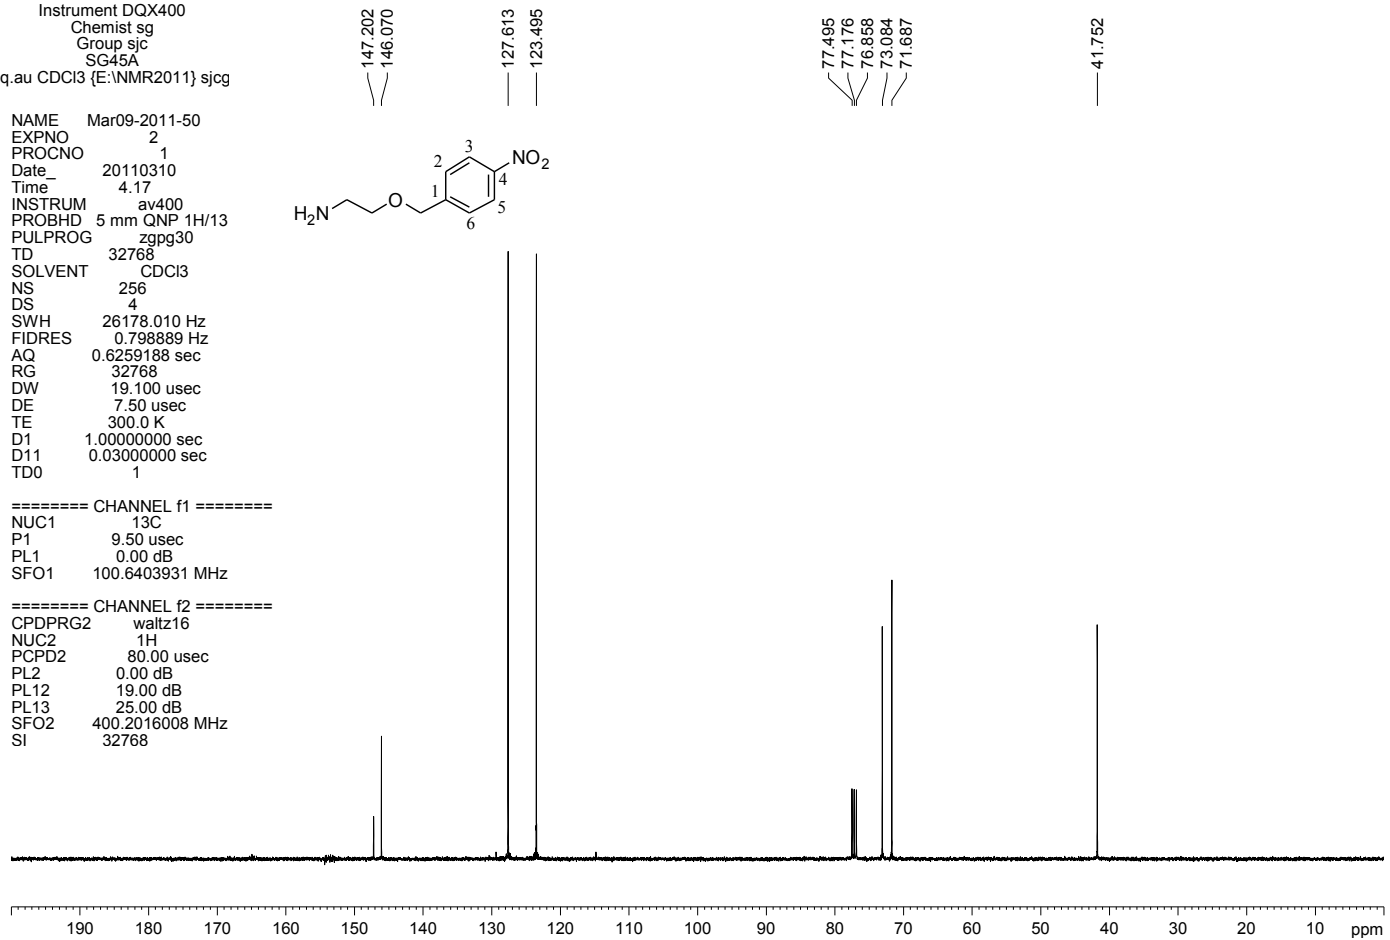

*N*-(2-([4-Nitrobenzyl]oxy)ethyl)-5,6-diphenylfuro[2,3-*d*]pyrimidin-4-amine (1) – <sup>1</sup>H NMR spectrum

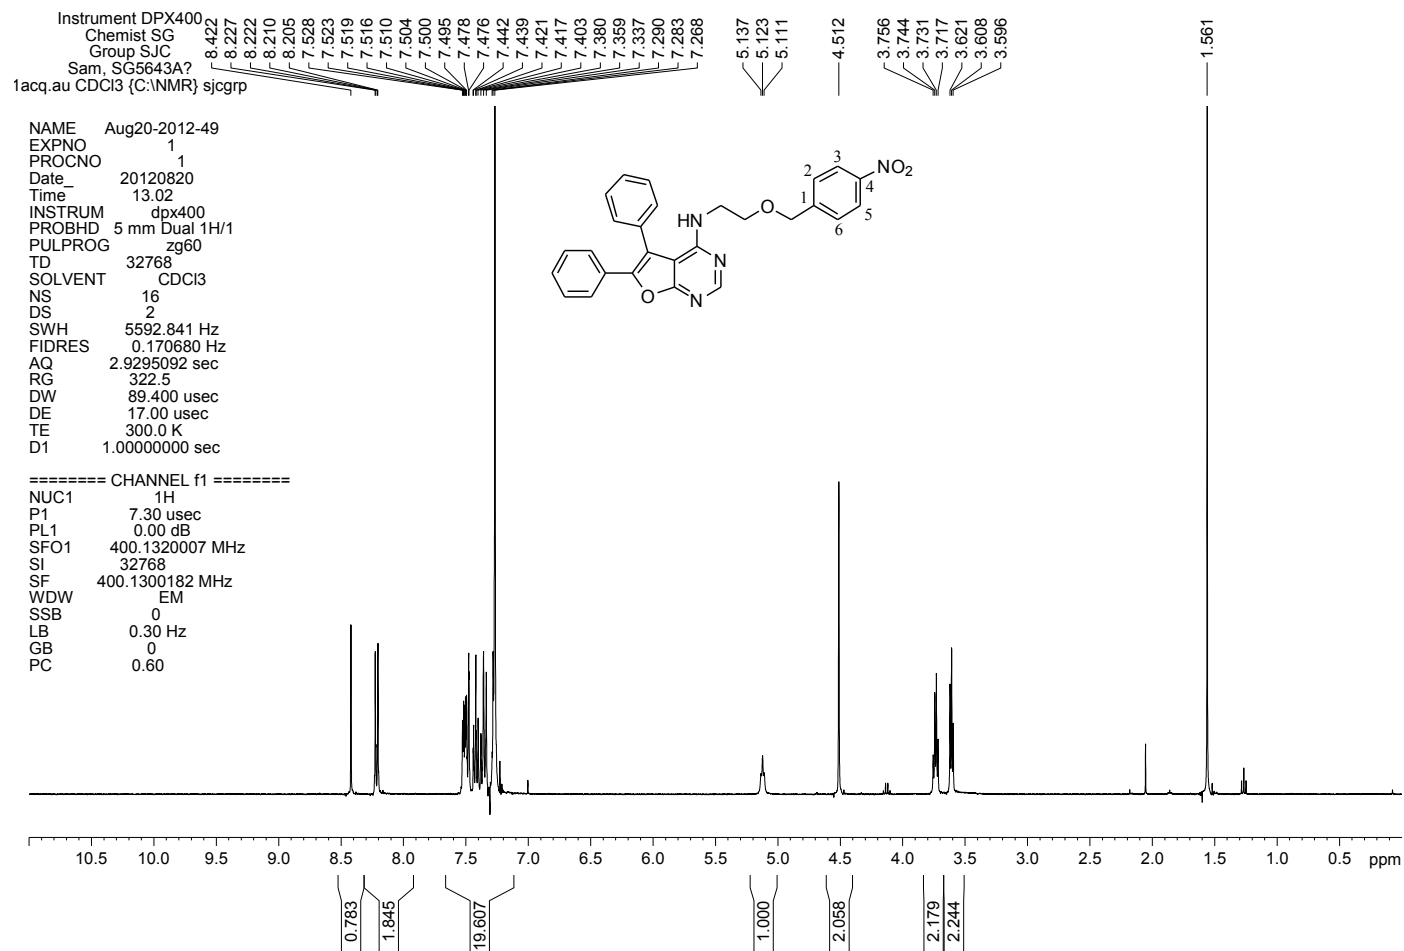

*N*-(2-([4-Nitrobenzyl]oxy)ethyl)-5,6-diphenylfuro[2,3-*d*]pyrimidin-4-amine (1) – <sup>13</sup>C NMR spectrum

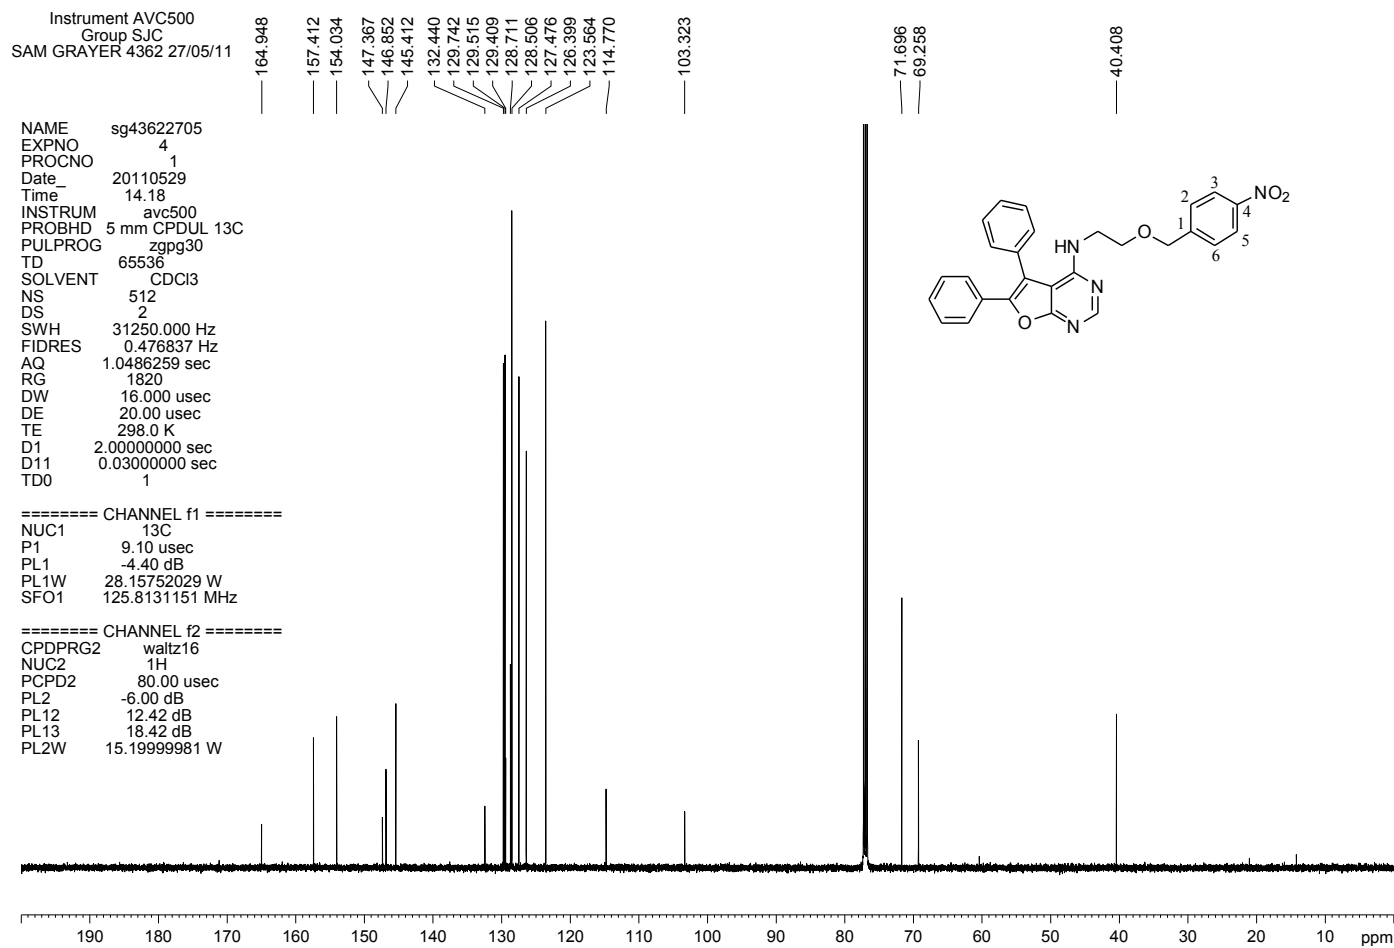

### 1-(Ethoxymethyl)-4-nitrobenzene (**13**) – <sup>1</sup>H NMR spectrum

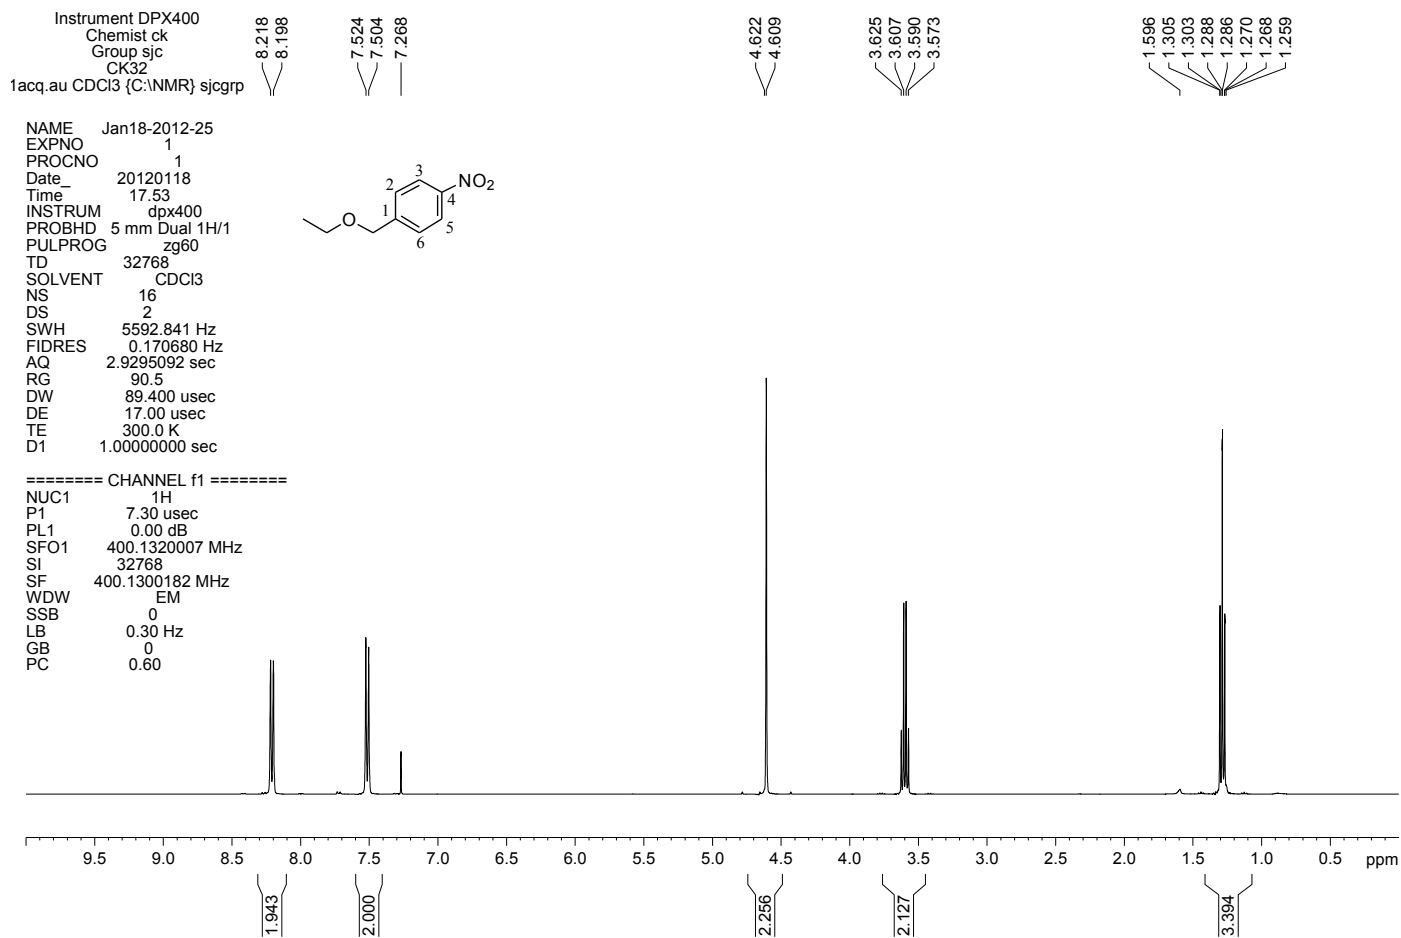

### 1-(Ethoxymethyl)-4-nitrobenzene (13) – <sup>13</sup>C NMR spectrum

Instrument DQX400  
 Chemist ck  
 Group sjc  
 CK32  
 xq.au CDCI3 [E:\NMR2012] sjcg

NAME Jan19-2012-39  
 EXPNO 1  
 PROCNO 1  
 Date\_ 20120119  
 Time 14.55  
 INSTRUM av400  
 PROBHD 5 mm QNP 1H/13  
 PULPROG zgpg30  
 TD 32768  
 SOLVENT CDCl3  
 NS 256  
 DS 4  
 SWH 26178.010 Hz  
 FIDRES 0.798889 Hz  
 AQ 0.6259188 sec  
 RG 32768  
 DW 19.100 usec  
 DE 7.50 usec  
 TE 300.0 K  
 D1 1.00000000 sec  
 D11 0.03000000 sec  
 TD0 1

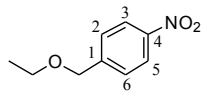

147.291  
 146.348

127.642  
 123.595

77.328  
 77.010  
 76.693  
 71.391  
 66.449

15.143

===== CHANNEL f1 =====  
 NUC1 13C  
 P1 9.50 usec  
 PL1 0.00 dB  
 SFO1 100.6403931 MHz

===== CHANNEL f2 =====  
 CPDPRG2 waltz16  
 NUC2 1H  
 PCPD2 80.00 usec  
 PL2 0.00 dB  
 PL12 19.00 dB  
 PL13 25.00 dB  
 SFO2 400.2016008 MHz  
 SI 32768

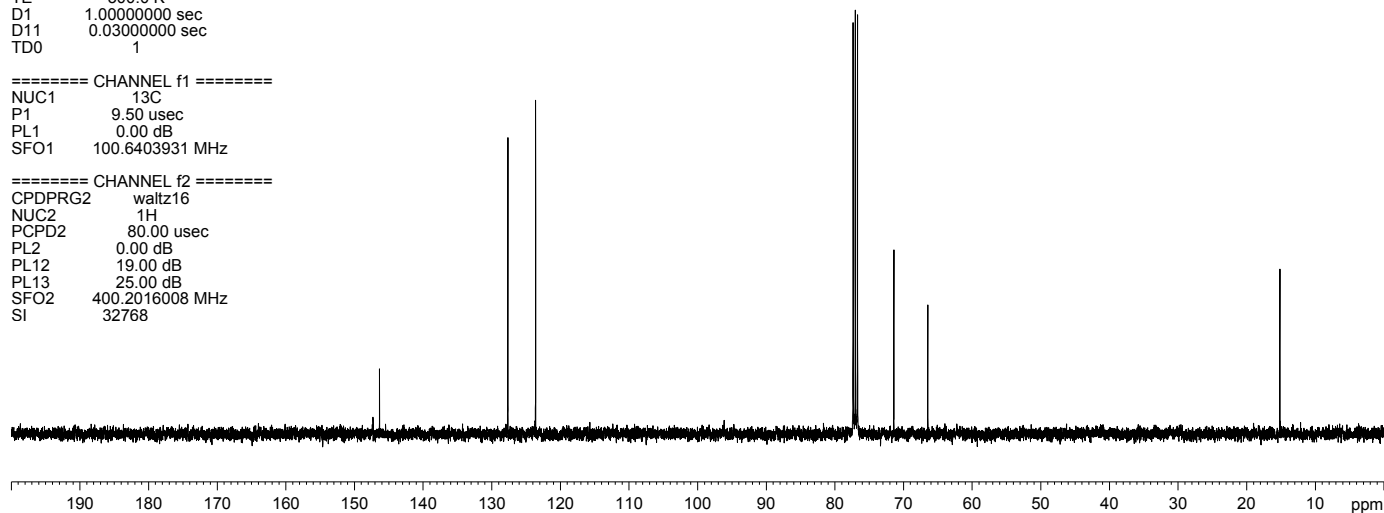

Supplement: cb4001537_si_001.pdf [file cb4001537_si_001.pdf]
